# Supplementary material for: One- and two-year visual outcomes from the Moorfields age-related macular degeneration database: a retrospective cohort study and an open science resource
Source: PubMed Central journal article supplement — BMJ Open. 2019 Jun 21;9(6):e027441. doi: 10.1136/bmjopen-2018-027441 (PMC6596999; doi:10.1136/bmjopen-2018-027441), 2019-06-21
Supplement: bmjopen-2018-027441.draft_revisions.pdf [file bmjopen-2018-027441.draft_revisions.pdf]

# BMJ Open

BMJ Open is committed to open peer review. As part of this commitment we make the peer review history of every article we publish publicly available.

When an article is published we post the peer reviewers' comments and the authors' responses online. We also post the versions of the paper that were used during peer review. These are the versions that the peer review comments apply to.

The versions of the paper that follow are the versions that were submitted during the peer review process. They are not the versions of record or the final published versions. They should not be cited or distributed as the published version of this manuscript.

BMJ Open is an open access journal and the full, final, typeset and author-corrected version of record of the manuscript is available on our site with no access controls, subscription charges or pay-per-view fees (<http://bmjopen.bmj.com>).

If you have any questions on BMJ Open's open peer review process please email [editorial.bmjopen@bmj.com](mailto:editorial.bmjopen@bmj.com)

# BMJ Open

## One and Two Year Visual Outcomes from the Moorfields AMD Database - an Open Science Resource for the Study of Neovascular Age-related Macular Degeneration

|                               |                                                                                                                                                                                                                                                                                                                                                                                                                                                                                                                                                                                                                                                                                                                                                                                                                                                                                                                                                                                                                                                                                                                                                 |
|-------------------------------|-------------------------------------------------------------------------------------------------------------------------------------------------------------------------------------------------------------------------------------------------------------------------------------------------------------------------------------------------------------------------------------------------------------------------------------------------------------------------------------------------------------------------------------------------------------------------------------------------------------------------------------------------------------------------------------------------------------------------------------------------------------------------------------------------------------------------------------------------------------------------------------------------------------------------------------------------------------------------------------------------------------------------------------------------------------------------------------------------------------------------------------------------|
| Journal:                      | <i>BMJ Open</i>                                                                                                                                                                                                                                                                                                                                                                                                                                                                                                                                                                                                                                                                                                                                                                                                                                                                                                                                                                                                                                                                                                                                 |
| Manuscript ID                 | bmjopen-2018-027441                                                                                                                                                                                                                                                                                                                                                                                                                                                                                                                                                                                                                                                                                                                                                                                                                                                                                                                                                                                                                                                                                                                             |
| Article Type:                 | Research                                                                                                                                                                                                                                                                                                                                                                                                                                                                                                                                                                                                                                                                                                                                                                                                                                                                                                                                                                                                                                                                                                                                        |
| Date Submitted by the Author: | 29-Oct-2018                                                                                                                                                                                                                                                                                                                                                                                                                                                                                                                                                                                                                                                                                                                                                                                                                                                                                                                                                                                                                                                                                                                                     |
| Complete List of Authors:     | Fasler, Katrin; Moorfields Eye Hospital NHS Foundation Trust, ; UniversitatsSpital Zurich Augenklinik und Poliklinik, Moraes, Gabriella; Moorfields Eye Hospital NHS Foundation Trust Wagner, Siegfried; Moorfields Eye Hospital NHS Foundation Trust Kortuem, Karsten; Moorfields Eye Hospital NHS Foundation Trust; Klinikum der Universitat Munchen Augenklinik Chopra, Reena; Moorfields Eye Hospital NHS Foundation Trust Faes, Livia; Moorfields Eye Hospital NHS Foundation Trust; Luzerner Kantonsspital Zentrumsspital Preston, Gabriella; Moorfields Eye Hospital NHS Foundation Trust Pontikos, Nikolas; Moorfields Eye Hospital NHS Foundation Trust Fu, Dun Jack; Moorfields Eye Hospital NHS Foundation Trust Patel, Praveen; NIHR Biomedical Research Centre at Moorfields Eye Hospital and UCL Institute of Ophthalmology, Tufail, Adnan; Moorfields Eye Hospital, Lee, Aaron; University of Washington, Department of Ophthalmology Balaskas, Konstantinos; Moorfields Eye Hospital NHS Foundation Trust; University of Manchester , School of Biological Sciences Keane, Pearse; Moorfields Eye Hospital NHS Foundation Trust |
| Keywords:                     | Age-related macular degeneration, Choroidal neovascularization, Anti-VEGF, Visual outcome, Electronic medical record, Real-world                                                                                                                                                                                                                                                                                                                                                                                                                                                                                                                                                                                                                                                                                                                                                                                                                                                                                                                                                                                                                |
|                               |                                                                                                                                                                                                                                                                                                                                                                                                                                                                                                                                                                                                                                                                                                                                                                                                                                                                                                                                                                                                                                                                                                                                                 |

SCHOLARONE™  
Manuscripts

1  
2  
3  
4  
5  
6  
7  
8  
9  
10  
11  
12  
13  
14  
15  
16  
17  
18  
19  
20  
21  
22

# One and Two Year Visual Outcomes from the Moorfields AMD Database - an Open Science Resource for the Study of Neovascular Age-related Macular Degeneration

23  
24  
25  
26  
27  
28  
29  
30  
31  
32  
33  
34  
35  
36  
37  
38  
39  
40  
41  
42  
43  
44  
45  
46  
47

Katrin Fasler,<sup>1,2</sup> Gabriella Moraes,<sup>1</sup> Siegfried K. Wagner,<sup>1</sup> Karsten U. Kortuem,<sup>1,3</sup>

Reena Chopra,<sup>1</sup> Livia Faes,<sup>1,4</sup> Gabriella Preston,<sup>1</sup> Nikolas Pontikos,<sup>1</sup> Dun Jack Fu,<sup>1</sup>

Praveen J. Patel,<sup>1</sup> Adnan Tufail,<sup>1</sup> Aaron Y. Lee,<sup>5</sup> Konstantinos Balaskas,<sup>1, 6</sup> Pearse

A. Keane <sup>1</sup>

<sup>1</sup> NIHR Biomedical Research Centre at Moorfields Eye Hospital NHS Foundation Trust and UCL  
Institute of Ophthalmology, London, UK.

<sup>2</sup> Department of Ophthalmology, University Hospital Zurich, Zurich, Switzerland.

<sup>3</sup> Munich, Germany.

<sup>4</sup> Eye Clinic, Cantonal Hospital of Lucerne, Lucerne, Switzerland.

<sup>5</sup> Department of Ophthalmology, University of Washington, Seattle, USA.

<sup>6</sup> School of Biological Sciences, University of Manchester, Manchester, UK.

## Correspondence and reprint requests:

48  
49  
50  
51  
52  
53  
54  
55  
56  
57  
58  
59  
60

Pearse A. Keane, MD FRCOphth, NIHR Biomedical Research Centre for Ophthalmology, Moorfields  
Eye Hospital NHS Foundation Trust and UCL Institute of Ophthalmology, United Kingdom. Tel: +44  
Fax: +44 Email: pearse.keane1@nhs.net

## Disclosure / Funding:

1  
2  
3 Dr. Fasler has received fellowship support from Alfred Vogt Stipendium and Schweizerischer Fonds  
4 zur Verhütung und Bekämpfung der Blindheit. She has been an external consultant for DeepMind.  
5  
6

7 Dr. Wagner is an academic clinical fellow funded by the National Institute of Health Research.  
8  
9 The views expressed in this publication are those of the author(s) and not necessarily those of the  
10 NHS, the National Institute for Health Research, Health Education England or the Department of  
11 Health.  
12  
13

14 Dr. Keane has received speaker fees from Heidelberg Engineering, Topcon, Carl Zeiss  
15 Meditec, Haag-Streit, Allergan, Novartis, and Bayer. He has served on advisory boards for Novartis  
16 and Bayer and has been an external consultant for DeepMind and Optos. Dr. Keane is supported by a  
17 United Kingdom (UK) National Institute for Health Research (NIHR) Clinician Scientist Award (NIHR-  
18 CS--2014-12-023). The views expressed are those of the author and not necessarily those of the  
19 NHS, the NIHR or the Department of Health.  
20  
21  
22  
23  
24  
25

26 Dr. Patel has received speaker fees from Novartis, UK, Bayer UK, and Roche UK and has  
27 received an advisory board honorarium from Novartis UK, Bayer UK.  
28  
29

30 Dr. Lee has received research funding from Novartis, NVIDIA, and Microsoft Corporation. He  
31 is supported by the National Institute of Health (K23EY029246) and Research to Prevent Blindness.  
32  
33  
34  
35  
36  
37  
38  
39  
40  
41  
42  
43  
44  
45  
46  
47  
48  
49  
50  
51  
52  
53  
54  
55  
56  
57  
58  
59  
60

1  
2  
3 **Running Head / Short title:**  
4  
5

6 The Moorfields AMD Database - Report 1  
7  
8  
9

10 **Keywords:**  
11  
12

13  
14 Age-related macular degeneration  
15

16 Choroidal neovascularization  
17

18 ranibizumab  
19

20 aflibercept  
21

22 Anti-VEGF  
23

24 Visual outcome  
25

26 Real-world  
27

28 Electronic medical record  
29  
30  
31

32 **Word Count:**  
33  
34

35  
36 Abstract - 300  
37

Main text - 2720  
38  
39

40 **Figures:**  
41  
42

43 3  
44  
45

46 **Tables:**  
47  
48

49  
50 2  
51  
52

53 **Supplementary Material:**  
54  
55

56 2  
57  
58  
59  
60

## Abbreviations:

AMD – age related macular degeneration

VEGF - vascular endothelial growth factor

VA - visual acuity

ETDRS - Early Treatment Diabetic Retinopathy Study

RCT - randomized controlled trial

LTFU - lost to follow-up

EMR - electronic medical record

NHS - National Health Service

ICHOM - International Consortium for Health Outcomes Measurement

FRB - Fight Retinal Blindness

CATT - Comparison of Age-related macular degeneration Treatment Trials

VIEW - Vascular endothelial growth factor Trap-Eye: Investigation of Efficacy and Safety in

Wet AMD study

## ABSTRACT

**Objectives:** To analyse treatment outcomes and share clinical data from a large, single-center, well-curated database (174 eyes / 6664 patients with 120,756 single entries) of patients with neovascular age related macular degeneration (AMD) treated with anti-vascular endothelial growth factor (VEGF). By making our depersonalised raw data openly available, we aim to stimulate further research in AMD, as well as setting a precedent for future work in this area.

**Setting:** Retrospective, comparative, non-randomised electronic medical record (EMR) database cohort study of the UK Moorfields AMD database with data extracted between 2008 and 2018.

**Participants:** 3357 eyes/patients (61% female). Extraction criteria were  $\geq 1$  ranibizumab or aflibercept injection, entry of "AMD" in the diagnosis field of the EMR, and a minimum of one year of follow-up. Exclusion criteria were unknown date of first injection and treatment outside of routine clinical care at Moorfields before the first recorded injection in the database.

**Main outcome measures:** Primary outcome measure was change in VA at one and two years from baseline as measured in Early Treatment Diabetic Retinopathy Study (ETDRS) letters. Secondary outcomes were the number of injections and predictive factors for VA gain.

**Results:** Mean VA gain at one-year and two years were  $+5.5 \pm 0.5$  and  $+4.9 \pm 0.68$  letters respectively. Fifty-four percent of eyes gained  $\geq 5$  letters at two years, 63% had stable VA ( $\pm \leq 14$  letters), forty-four percent of eyes maintained good VA ( $\geq 70$  letters). Patients received a mean of  $7.7 \pm 0.06$  injections during year one and  $13.0 \pm 0.2$  injections over two years.

1  
2  
3 Younger age, lower baseline VA, and more injections were associated with higher VA gain at  
4  
5 two years.  
6

7 **Conclusion:** This study benchmarks high quality EMR study results of real life AMD  
8  
9 treatment and promotes open science in clinical AMD research by making the underlying  
10  
11 data publicly available.  
12  
13  
14  
15  
16  
17  
18  
19  
20  
21  
22  
23  
24  
25  
26  
27  
28  
29  
30  
31  
32  
33  
34  
35  
36  
37  
38  
39  
40  
41  
42  
43  
44  
45  
46  
47  
48  
49  
50  
51  
52  
53  
54  
55  
56  
57  
58  
59  
60

For peer review only



## Strengths and limitations of this study

- Large sample size, retrospective, single centre, electronic medical record database study
- High quality real life data
- Open science approach with sharing of depersonalised raw data

For peer review only

## INTRODUCTION

The treatment of neovascular age-related macular degeneration (AMD) has been revolutionised by the development of anti-vascular endothelial growth factor (VEGF) agents such as ranibizumab and aflibercept.(1–4) Unfortunately, real world results from retrospective studies are typically inferior to those from randomised controlled trials (RCTs), with fewer administered injections and significant inter-country and inter-center differences in therapy administration and outcomes.(5–9) Although retrospective studies and audits may be more likely than RCTs to reflect results in clinical practice, they still are not truly representative of outcomes in real world populations.(5–7,10,11) Major drawbacks of retrospective study designs are small sample sizes with selection bias and sub-optimal methods for handling of both missing data and losses to follow-up (LTFU).(11,12) Survival bias in particular can lead to skewed results: omission of cases LTFU from the analysis leads to selection of a non-random cohort with potential overestimation of visual acuity (VA) gains through exclusion of patients that stop treatment early due to irreversible visual loss such as foveal scarring or other adverse effects.

The advent of electronic medical records (EMR) has facilitated the collection of large amounts of data in routine clinical practice and thus has the potential to make retrospective study populations more representative of real life.(13–18) This is very much dependent, however, on the quality of data entry and the reliable follow-up of patients, and so these issues can remain problematic. The amount of data available from EMR systems also challenges the traditional methods of validation, analytics and reporting, and there is a struggle to implement the existing clinical research guidelines.(12,19–21) For example, in 2015, the RECORD statement highlighted the challenges of using routinely collected observational health data.(21) A further problem is the variation of data collection in the different EMR registers in different hospitals and countries. The International Consortium for Health Outcomes Measurement (ICHOM) AMD working group has also proposed a standard set of clinical characteristics, interventions, and outcomes including preferential methods of

1  
2  
3 VA recording (logarithm of the minimum angle of resolution or Early Treatment Diabetic  
4 Retinopathy Study (ETDRS) letters).(22)  
5  
6

7 At Moorfields Eye Hospital, an EMR was initiated in October 2008, and its successor,  
8 OpenEyes™, was implemented in September 2012. Subsequently, data from both systems  
9 were merged into the current centralised repository, the data warehouse. We have created a  
10 dataset from this which represents, to our knowledge, the largest single-center cohort of  
11 patients receiving treatment for neovascular AMD in the world. This Moorfields AMD dataset  
12 is increasing steadily, with 909 new patients in 2017 alone, a number typically only  
13 comparable in magnitude to multicenter studies.(14,16) Apart from its sheer size, key  
14 advantages of this dataset include the ability to clean and validate data directly, the  
15 completeness due to the mandatory input of relevant fields including VA, the consistency of  
16 VA measurements in ETDRS letters, the lack of requirement to merge data from different  
17 sites and systems, the standardised treatment scheme following national guidelines, and the  
18 ability to directly access the raw imaging data from each study visit.  
19  
20  
21  
22  
23  
24  
25  
26  
27  
28  
29  
30  
31

32 The aim of this study is to analyse one- and two-year VA outcomes, determine  
33 predictive factors of VA gain in treatment-naive eyes from the Moorfields AMD database,  
34 and to aid in scientific progress by making the de-personalised raw data from from our study  
35 openly available to the research community.(21,23)  
36  
37  
38  
39  
40  
41  
42  
43  
44  
45  
46  
47  
48  
49  
50  
51  
52  
53  
54  
55  
56  
57  
58  
59  
60

## METHODS

### Data Collection:

Data for this retrospective, comparative, non-randomised cohort study were extracted from the data warehouse, the centralised storage for all EMR data, of Moorfields Eye Hospital. Data were extracted between October 21, 2008 and August 08, 2018. Extraction criteria were  $\geq 1$  ranibizumab or aflibercept injection, entry of "AMD" in the diagnosis field of the EMR, and a minimum of one year of follow-up. Exclusion criteria were unknown date of first injection, any treatment outside of routine clinical care at Moorfields before the first recorded injection in the database, including pegaptanib, previous laser or photodynamic therapy, and bevacizumab. The rationale for exclusion of bevacizumab is that in the National Health Service (NHS), neovascular AMD is generally treated with the licensed therapeutics ranibizumab or aflibercept, and not with the off-label bevacizumab.(24,25) The date of the first injection was defined as the baseline date. The dataset has been depersonalised for publication and approval for data collection and analysis was obtained from the Institutional Review Board at Moorfields (ROAD17/031). The study adhered to the tenets set forth in the Declaration of Helsinki.

### Outcome Measures:

The primary outcomes were mean change in VA from baseline as measured in ETDRS letters, proportion of eyes gaining  $\geq 5$  letters, proportion of eyes with stable vision (change in VA  $<15$  letters to baseline), proportion of eyes with good vision ( $\geq 20/40$  or 70 letters), and proportion of eyes with poor vision ( $\leq 20/200$  or 35 letters). Those endpoints have been used in the pivotal trials and/or have been included in the ICHOM reporting recommendations.(1–

1  
2  
3 4,22) Secondary outcomes included the number of injections, and effect of baseline  
4 characteristics and injection numbers on changes in VA. Definitions for one-year and two-  
5 year outcome dates were taken from previous real-world studies as visits closest to 52  
6 weeks and 104 weeks post baseline date within  $\pm 8$  weeks.(6,13) We used the STROBE  
7 cohort checklist when writing our report.(20)  
8  
9  
10  
11  
12

### 13 14 15 **Efforts to Minimize Bias:**

16  
17  
18 Clinical information from patients with neovascular AMD is manually entered to the  
19 Moorfields Eye Hospital EMR (OpenEyes™) at each visit. The EMR requires mandatory  
20 completion for a number of fields at each patient visit, including VA, central retinal thickness,  
21 treatment decision, treatment drug, and injection number, thus minimizing the number of  
22 missing data entries. Of all 120,756 single entries, missing / zero visual acuity  
23 measurements were encountered in 4059 (4.1%) of all entries. After manual cleaning of all  
24 4059 missing entries, missing data accounted for 808 (0.9%) entries. Patients aged <55 or  
25 >100 and eyes with injection numbers  $\geq 50$  were manually checked. Description of manual  
26 cleaning including a CONSORT diagram is shown in supplementary material  
27  
28  
29  
30  
31  
32  
33  
34  
35  
36  
37  
38  
39  
40  
41 (Supplementary 1, sFigure 1). Visual acuities below measurable ETDRS letters were  
42 converted to logMAR 2.0/-15 letters, logMAR 2.3/-30 letters and logMAR 2.7/-50 letters for  
43 count fingers, hand movements, and light perception respectively.(26) To avoid bias due to  
44 inter-eye correlation, statistical analysis was restricted to one eye per patient, i.e. the first  
45 eye of a patient if sequentially treated, and a randomly selected eye if simultaneously  
46 treated. Outcomes of second-treated fellow eyes will be reported separately.  
47  
48  
49  
50  
51  
52  
53  
54  
55

### 56 **Statistical Analysis:**

57  
58  
59  
60

1  
2  
3 The data were analysed using the statistics software R (<https://www.r-project.org/>; provided in  
4 the public domain by R Core team 2017 R Foundation for Statistical Computing, Vienna, Austria).  
5  
6 The ggplot2 package was used for plots. The eye was defined as unit of analysis. Descriptive  
7 statistics included mean +/- 95% confidence interval (CI), and median, where appropriate.  
8  
9 Differences between groups were evaluated using Mann Whitney U test and Pearson Chi-  
10 Square. Regression analysis was performed to assess relationship of predictive factors and  
11 VA gains. A *p* value of < 0.05 was interpreted as statistically significant.  
12  
13  
14  
15  
16  
17  
18  
19  
20

### 21 **Patient and Public Involvement:**

22  
23  
24 Patients and public were not involved in the study as this was a retrospective cohort study.  
25  
26  
27

### 28 **Data Sharing Statement:**

29  
30 De-personalised data for this study will be openly available from the Dryad Digital Repository  
31 <https://doi.org/10.5061/dryad.97r9289>. Depersonalisation was carried out through hash  
32 function anonymisation of patient identification numbers, replacement of appointment dates  
33 with follow-up days to baseline, and categorising extreme age groups into age categories.  
34  
35 Approval of adequate depersonalisation was obtained by Moorfields Information  
36  
37  
38  
39  
40  
41 Governance.  
42  
43  
44  
45  
46  
47  
48  
49  
50  
51  
52  
53  
54  
55  
56  
57  
58  
59  
60

## RESULTS

### Patient Demographics:

The full dataset consisted of 8174 treatment-naïve eyes/6664 patients with 120,756 single entries treated for neovascular AMD in the Moorfields database between October 21, 2008 and August 9, 2018.

The dataset for analysis consisted of 3357 eyes/patients (61% female). Mean age was  $78.2 \pm 0.3$  years at baseline. Mean VA was  $56.4 \pm 0.5$  letters. Of these, 1105 eyes (33%) were treated with ranibizumab, 1533 (46%) with aflibercept, and 719 eyes (21%) were treated with both ranibizumab and aflibercept. The starting year of treatment ranged between 2007-2018. Therapeutic choices at Moorfields Eye Hospital changed after 2013 and both ranibizumab and aflibercept were offered as alternative first line agents. After this change, a number of patients were switched from one agent to another resulting in over 50% of eyes receiving both drugs during the course of treatment. Baseline characteristics are shown in Table 1.

|                                                   | Baseline characteristics | One year outcomes |                          |                                  |                     | Two year outcomes |
|---------------------------------------------------|--------------------------|-------------------|--------------------------|----------------------------------|---------------------|-------------------|
|                                                   |                          | Full cohort       | One year only completers | One year vs. two year completers | Two year completers |                   |
| Number of eyes / patients                         | 3357                     | 3357              | 1601                     |                                  | 1756                | 2177              |
| Baseline age (years) $\pm$ CI                     | 78 $\pm$ 0.3             | 78 $\pm$ 0.3      | 79 $\pm$ 0.3             | p<0.001                          | 77 $\pm$ 0.4        | 77 $\pm$ 0.4      |
| Gender female / male                              | 61 / 39                  | 61 / 39           | 61 / 39                  |                                  | 61 / 39             | 61 / 39           |
| Baseline VA (letters) $\pm$ CI                    | 56.2 $\pm$ 0.57          | 56.2 $\pm$ 0.57   | 54.4 $\pm$ 0.57          | p<0.001                          | 57.9 $\pm$ 0.7      | 57.8 $\pm$ 0.7    |
| Mean VA (letters) $\pm$ CI                        | 56.2 $\pm$ 0.57          | 61.8 $\pm$ 0.57   | 58.5 $\pm$ 0.57          | p<0.001                          | 64.8 $\pm$ 0.7      | 62.7 $\pm$ 0.7    |
| Change in VA (letters) $\pm$ CI                   |                          | 5.5 $\pm$ 0.5     | 4.1 $\pm$ 0.5            | p<0.001                          | 6.8 $\pm$ 0.68      | 4.9 $\pm$ 0.68    |
| % of eyes gaining $\geq$ 5 letters                |                          | 54%               | 51%                      | p<0.001                          | 58%                 | 54%               |
| % of eyes with stable vision ( $\pm$ <15 letters) |                          | 66%               | 65%                      | p=0.378                          | 66%                 | 63%               |
| % of eyes with good VA ( $\geq$ 20/40)            | 24%                      | 42%               | 35%                      | p<0.001                          | 49%                 | 44%               |
| % of eyes with poor VA ( $\leq$ 20/200)           | 17%                      | 11%               | 16%                      | p<0.001                          | 6%                  | 10%               |
| Mean injection number $\pm$ CI over time          |                          | 7.7 $\pm$ 0.06    | 7.5 $\pm$ 0.06           | p<0.001                          | 8.0 $\pm$ 0.2       | 13.0 $\pm$ 0.2    |

Table 1: Baseline characteristics, one and two year outcomes, VA - visual acuity, CI - 95% confidence interval

Of the 1162 patients not completing the two year follow-up date, 254 patients had died. LTFU occurred in 27% of eyes for two year follow-up. To address the potentially resulting survival bias of, one-year outcomes for the cohort not completing 2-year follow-up and the cohort completing the 2-year follow-up are shown.



## Visual outcomes at one and two years

Mean VA gain at one and two years were  $+5.5\pm 0.5$  and  $+4.9\pm 0.68$  letters respectively. The mean number of injections over the first year and first two years were  $7.7\pm 0.06$  and  $13.0\pm 0.2$  respectively (Figure 1). Percentages of eyes gaining vision (change in VA  $\geq 5$  letters), stable vision (change in VA  $< 15$  letters), good vision (VA  $\geq 70$  letters/ $> 20/40$ ), and poor vision (VA  $\leq 35$  letters/ $\leq 20/200$ ) are shown in Table 1 and Figure 2.

Comparison of subgroups that did not complete the two-year follow-up and the cohort that did complete the two-year follow-up showed a significantly lower mean baseline VA for those with a follow-up of less than two years (54.4 vs. 57.9 letters,  $p < 0.05$ ) a lower mean gain of letters (4.1 vs. 6.8 letters,  $p < 0.05$ ) as well as a lower injection frequency (7.5 vs. 8.0,  $p < 0.05$ ) at one year.

## Determinants of change in VA at one and two years

Regression to predict change in VA at one and two years from gender, baseline age, baseline VA, and injection number, showed only baseline VA, baseline age and injection number as significantly adding to the prediction (one year:  $F(8, 3384)=67.2$ ,  $p < 0.001$ ,  $R^2=0.1383$ ); two years:  $F(8, 2168)=64.26$ ,  $p < 0.001$ ,  $R^2=0.1917$ ). Lower baseline VA, lower baseline age, and higher number of injections are associated with a higher VA change at two years (Figure 3).

## DISCUSSION

In this study, we show that patients treated with ranibizumab and/or aflibercept for neovascular AMD at Moorfields Eye Hospital achieve good visual outcomes, particularly those patients who present at an earlier age with better visual acuity, and who subsequently receive frequent intravitreal injections.

The Moorfields AMD Database is a large, consistent, and clean dataset of neovascular AMD treatment and visual outcomes, perhaps the largest single-center dataset of its kind worldwide. We have made this freely available to download with this manuscript in an effort to benefit the AMD research community. At a minimum this will allow for use of alternative statistical approaches and facilitate research reproducibility. (21) We also hope it will allow for the testing of new hypotheses and thus provide new insights into the treatment of this condition.(27) We have also developed systems so that the Moorfields AMD Database is automatically updated over time, with minimal need for manual cleaning of data. Just under 1000 new cases of neovascular AMD present to Moorfields Eye Hospital on a yearly basis - this may be particularly useful as new therapeutics for AMD continue to be introduced. Additionally, we plan on releasing data for long-term follow-up of these (five years and beyond), as well as their associated raw imaging data (colour fundus photography and optical coherence tomography (OCT) imaging in every eye at every visit).

At one and two years, our results of mean VA gains confirm the existing evidence in real-life studies, e.g., the Fight Retinal Blindness (FRB) group in Australia/New Zealand for ranibizumab/aflibercept with nearly identical baseline characteristics and visual acuity outcomes for mixed ranibizumab/aflibercept treatment (Table 2).(10,28)

| Two year results                            | Retrospective, real-life studies |                             |                               |                      | Prospective randomised trials |                        |
|---------------------------------------------|----------------------------------|-----------------------------|-------------------------------|----------------------|-------------------------------|------------------------|
|                                             | Moorfields<br>R / A<br>1737 eyes | EMR Users<br>R<br>4990 eyes | FRB<br>B / R / A<br>1189 eyes | FRB<br>A<br>136 eyes | CATT<br>R / B<br>1107 eyes    | VIEW<br>A<br>2063 eyes |
| Baseline age (years)                        | 77                               | 80                          | 79                            | 77                   | 79                            | 75.6-76.5              |
| Baseline VA (letters)                       | 57.8                             | 55                          | 56.5                          | 61.4                 | 59.9-61.6                     | 53.6-54.0              |
| Change in VA (letters)                      | 4.9                              | +1                          | +5.3                          | +6                   | 8.0-8.5                       | 7.6-7.9                |
| % of eyes with good<br>VA ( $\geq 20/40$ )  | 44%                              | 30%                         | 45%                           | 58%                  | 67-68%                        | 30.7-34.9              |
| % of eyes with poor VA<br>( $\leq 20/200$ ) | 10%                              | -                           | 11%                           | 10%                  | 4.7-8.4%                      | -                      |
| Mean injection number                       | 13.0                             | 9.4                         | 13                            | 13.6                 | 11.8                          | 16.5                   |

Table 2: Comparison of two year outcomes with other real-life studies and randomised controlled trials. VA - visual acuity, A - aflibercept, R - ranibizumab, B - bevacizumab, EMR - electronic medical record, FRB - fight retinal blindness, CATT - comparison of Age-related Macular Degeneration Treatments Trials, VIEW - VEGF Trap-Eye: Investigation of Efficacy and Safety in Wet AMD

However, VA gains reported by the Writing Committee for the UK Age-Related Macular Degeneration EMR Users Group are considerably poorer which likely is explained by the reported capacity constraints resulting in reduced treatment frequency of with a mean of 9.4 injections over 2 years versus over 13 in our cohort and the FRB.(16) VA results from randomised prospective studies (e.g., the Comparison of Age-related macular degeneration Treatment Trials (CATT) and Vascular endothelial growth factor Trap-Eye: Investigation of Efficacy and Safety in Wet AMD study (VIEW)) have been shown to be superior to retrospective real-life data.(1,4)

1  
2  
3 This is also reflected in our data and is explained by the broader inclusion criteria,  
4 and the less strict treatment regimens with fewer administered injections. Comparison of  
5 cohorts that completed only one year of follow-up versus two or more years showed that  
6 eyes with shorter follow-up were older, had lower baseline VA, gained fewer letters at the  
7 one year follow-up, and received fewer injections over the first year. The loss to follow-up  
8 reflects the real-life setting of the study where patients transfer to stable AMD clinics, their  
9 vision has deteriorated and rendered further treatment unreasonable, or they are not able to  
10 further attend clinics. We deliberately did not perform any imputational replacement of  
11 missing data, but clearly describe the baseline characteristics and compare the one year  
12 results of the cohort LTFU before two years.(12)

13  
14  
15  
16  
17  
18  
19  
20  
21  
22  
23  
24  
25  
26  
27  
28  
29  
30  
31  
32  
33  
34  
35  
36  
37  
38  
39  
40  
41  
42  
43  
44  
45  
46  
47  
48  
49  
50  
51  
52  
53  
54  
55  
56  
57  
58  
59  
60  
VA gain over time is dependent on baseline characteristics and injection  
frequency.(12,14,29) Increasing age diminishes the VA gain expected as does a higher  
baseline acuity due to ceiling effect.(30) Baseline VA could even emerge as a surrogate  
measure for accessibility to treatment and quality of care, since simply looking at VA gains  
would underestimate centers that achieve short time from diagnosis to first treatment  
resulting in above average baseline VA but ceiling effect on VA gains.(8,12,16) Injection  
frequency has been recognised as another significant factor influencing VA gain and has  
been hypothesised to be the major factor in studies comparing ranibizumab and aflibercept  
due to the change in posology from treatment as needed to treat-and-extend concomitant  
with the change from ranibizumab to aflibercept in clinical practice.(14,29,31,32).

The retrospective nature and EMR-based data collection of our study introduce  
several limiting factors. Smoking status of our patients was not consistently available and  
thus, could not be included in the prediction model. Smoking has been identified as a risk  
factor for the development of neovascular AMD, but might also impact treatment  
response.(33) There is invariably survival bias within the data, as LTFU cannot be assumed  
to occur at random. However, baseline characteristics of LTFU as well as differences in  
outcomes for one and two year follow-up cohorts have been clearly described to address  
this. To date, there is no systematic collection of patient-reported outcome measures

1  
2  
3 (mobility and independence, emotional well-being, as well as reading and accessing  
4 information questionnaires) as suggested by ICHOM.(22) The main advantages of this study  
5 are the quality and amount of data coming from one single center and one database.  
6  
7 Moorfields Eye Hospital has a standardised treatment protocol for neovascular AMD,  
8 formerly treatment as needed, and fixed-first year/treat-and extend regimen with the  
9 introduction of aflibercept in 2014 (flow chart for aflibercept use is shown in Supplementary  
10 2). The extensive manual cleaning and the homogeneous standards of data input (VA in  
11 ETDRS letters, mandatory fields) have formed a highly reliable resource which will be  
12 enhanced in the future with an automated update and validation to allow for continued  
13 growth and quality improvement of clinical AMD data.  
14  
15  
16  
17  
18  
19  
20  
21  
22  
23

24 In conclusion, this study shows that with a diligent approach, analysis of well  
25 maintained EMR data can lead to high quality real-life results and electronic availability of  
26 data facilitates maximisation of its potential in sharing research resources with the  
27 community, ultimately with the goal of improving patient care in real-life. In the near future,  
28 we plan to report on long-term visual outcomes (e.g., after 5-years), anatomic outcomes, and  
29 fellow-eye involvement, as well as the differential therapeutic effects of ranibizumab and  
30 aflibercept. In each case, we plan to release the raw data that underpins these reports - we  
31 hope that this will help promote an open-science approach to the study of neovascular AMD,  
32 and thus to direct patient benefit in the longer term.  
33  
34  
35  
36  
37  
38  
39  
40  
41  
42  
43  
44  
45  
46  
47  
48  
49  
50  
51  
52  
53  
54  
55  
56  
57  
58  
59  
60

## Author / contributorship statement

Katrin Fasler has drafted the manuscript and contributed to data acquisition, analysis, and interpretation of data. She is accountable for all aspects of the work and has approved for the final version to be published.

Siegfried K. Wagner and Karsten U. Kortuem have contributed in design of the study, interpretation of data as well as critical revision of the manuscript. They share accountability for all aspects of the work and have approved for the final version to be published.

Livia Faes, Dun Jack Fu, and Aaron Y. Lee have contributed to analysis and interpretation of the data and critical revision of the manuscript. They share accountability for all aspects of the work and have approved for the final version to be published.

Gabriella Moraes, Gabriella Preston, Reena Chopra, and Nikolas Pontikos have contributed to acquisition of data and critical revision of the manuscript. They share accountability for all aspects of the work and have approved for the final version to be published.

Konstantinos Balaskas, Praveen J. Patel, Adnan Tufail, and Pearse A. Keane have contributed to conception of the work, interpretation of data and critical revision of the manuscript. They share accountability for all aspects of the work and have approved for the final version to be published.

## REFERENCES

1. Martin DF, Maguire MG, Fine SL, et al. Ranibizumab and Bevacizumab for Treatment of Neovascular Age-related Macular Degeneration. *Ophthalmology* [Internet]. 2012 Jul;119(7):1388–98. Available from: <http://linkinghub.elsevier.com/retrieve/pii/S0161642012003211>
2. Brown DM, Michels M, Kaiser PK, et al. Ranibizumab versus verteporfin photodynamic therapy for neovascular age-related macular degeneration: Two-year results of the ANCHOR study. *Ophthalmology* [Internet]. 2009 Jan;116(1):57–65.e5. Available from: <http://dx.doi.org/10.1016/j.ophtha.2008.10.018>
3. Rosenfeld PJ, Brown DM, Heier JS, et al. Ranibizumab for neovascular age-related macular degeneration. *N Engl J Med* [Internet]. 2006 Oct 5;355(14):1419–31. Available from: <http://dx.doi.org/10.1056/NEJMoa054481>
4. Heier JS, Brown DM, Chong V, et al. Intravitreal aflibercept (VEGF trap-eye) in wet age-related macular degeneration. *Ophthalmology* [Internet]. 2012 Dec;119(12):2537–48. Available from: <http://dx.doi.org/10.1016/j.ophtha.2012.09.006>
5. Holz FG, Tadayoni R, Beatty S, et al. Multi-country real-life experience of anti-vascular endothelial growth factor therapy for wet age-related macular degeneration. *Br J Ophthalmol* [Internet]. 2015 Feb;99(2):220–6. Available from: <http://dx.doi.org/10.1136/bjophthalmol-2014-305327>
6. Cohen SY, Mimoun G, Oubraham H, et al. Changes in visual acuity in patients with wet age-related macular degeneration treated with intravitreal ranibizumab in daily clinical practice: the LUMIERE study. *Retina* [Internet]. 2013 Mar;33(3):474–81. Available from: <http://dx.doi.org/10.1097/IAE.0b013e31827b6324>
7. Finger RP, Wiedemann P, Blumhagen F. Treatment patterns, visual acuity and quality-of-life outcomes of the WAVE study—A noninterventional study of ranibizumab treatment for neovascular age related macular degeneration in Germany. *Acta* [Internet]. 2013; Available from: <http://onlinelibrary.wiley.com/doi/10.1111/j.1755-3768.2012.02493.x/full>
8. Liew G, Lee AY, Zarranz-Ventura J, et al. The UK Neovascular AMD Database Report 3: inter-centre variation in visual acuity outcomes and establishing real-world measures of care. *Eye* [Internet]. 2016 Nov;30(11):1462–8. Available from: <http://dx.doi.org/10.1038/eye.2016.149>
9. Eleftheriadou M, Gemenetzi M, Lukic M, et al. Three-Year Outcomes of Aflibercept Treatment for Neovascular Age-Related Macular Degeneration: Evidence from a Clinical Setting. *Ophthalmol Ther* [Internet]. 2018 Jul 7; Available from: <http://dx.doi.org/10.1007/s40123-018-0139-5>
10. Barthelmes D, Nguyen V, Daien V, et al. Two year outcomes of “treat and extend” intravitreal therapy using aflibercept preferentially for neovascular age-related macular degeneration. *Retina* [Internet]. 2018 Jan;38(1):20–8. Available from: <http://dx.doi.org/10.1097/IAE.0000000000001496>
11. Chong V. Ranibizumab for the treatment of wet AMD: a summary of real-world studies. *Eye* [Internet]. 2016 Feb;30(2):270–86. Available from: <http://dx.doi.org/10.1038/eye.2015.217>



12. Mehta H, Tufail A, Daien V, et al. Real-world outcomes in patients with neovascular age-related macular degeneration treated with intravitreal vascular endothelial growth factor inhibitors. *Prog Retin Eye Res* [Internet]. 2018 Jan 2; Available from: <http://dx.doi.org/10.1016/j.preteyeres.2017.12.002>
13. Lotery A, Griner R, Ferreira A, et al. Real-world visual acuity outcomes between ranibizumab and aflibercept in treatment of neovascular AMD in a large US data set. *Eye* [Internet]. 2017 Dec;31(12):1697–706. Available from: <http://dx.doi.org/10.1038/eye.2017.143>
14. Rao P, Lum F, Wood K, et al. Real-World Vision in Age-Related Macular Degeneration Patients Treated with Single Anti-VEGF Drug Type for 1 Year in the IRIS Registry. *Ophthalmology* [Internet]. 2017 Nov 13; Available from: <http://dx.doi.org/10.1016/j.ophtha.2017.10.010>
15. Almuhtaseb H, Johnston RL, Talks JS, et al. Second-year visual acuity outcomes of nAMD patients treated with aflibercept: data analysis from the UK Aflibercept Users Group. *Eye* [Internet]. 2017 Nov;31(11):1582–8. Available from: <http://dx.doi.org/10.1038/eye.2017.108>
16. Writing Committee for the UK Age-Related Macular Degeneration EMR Users Group. The neovascular age-related macular degeneration database: multicenter study of 92 976 ranibizumab injections: report 1: visual acuity. *Ophthalmology* [Internet]. 2014 May;121(5):1092–101. Available from: <http://dx.doi.org/10.1016/j.ophtha.2013.11.031>
17. Kataja M, Hujanen P, Huhtala H, et al. Outcome of anti-vascular endothelial growth factor therapy for neovascular age-related macular degeneration in real-life setting. Available from: <http://dx.doi.org/10.1136/bjophthalmol-2017-311055>
18. Ozturk M, Harris ML, Nguyen V, et al. Real-world visual outcomes in patients with neovascular age-related macular degeneration receiving aflibercept at fixed intervals as per UK licence. *Clin Experiment Ophthalmol* [Internet]. 2017 Oct 17; Available from: <http://dx.doi.org/10.1111/ceo.13085>
19. Denaxas S, Direk K, Gonzalez-Izquierdo A, et al. Methods for enhancing the reproducibility of biomedical research findings using electronic health records. *BioData Min* [Internet]. 2017 Sep 11;10:31. Available from: <http://dx.doi.org/10.1186/s13040-017-0151-7>
20. von Elm E, Altman DG, Egger M, et al. The Strengthening the Reporting of Observational Studies in Epidemiology (STROBE) statement: guidelines for reporting observational studies. *Lancet* [Internet]. 2007 Oct 20;370(9596):1453–7. Available from: [http://dx.doi.org/10.1016/S0140-6736\(07\)61602-X](http://dx.doi.org/10.1016/S0140-6736(07)61602-X)
21. Benchimol EI, Smeeth L, Guttman A, et al. The REporting of studies Conducted using Observational Routinely-collected health Data (RECORD) statement. *PLoS Med* [Internet]. 2015 Oct;12(10):e1001885. Available from: <http://dx.doi.org/10.1371/journal.pmed.1001885>
22. Rodrigues IA, Sprinkhuizen SM, Barthelmes D, et al. Defining a Minimum Set of Standardized Patient-centered Outcome Measures for Macular Degeneration. *Am J Ophthalmol* [Internet]. 2016 Aug;168:1–12. Available from: <http://dx.doi.org/10.1016/j.ajo.2016.04.012>
23. Packer M. Data sharing in medical research. *BMJ* [Internet]. 2018 Feb 14;360:k510. Available from: <http://dx.doi.org/10.1136/bmj.k510>



- 1  
2  
3 24. Cohen D. Why have UK doctors been deterred from prescribing Avastin? *BMJ* [Internet].  
4 2015 Apr 1;350:h1654. Available from: <http://dx.doi.org/10.1136/bmj.h1654>  
5  
6 25. Hambleton D. Commentary: NHS patients should have a choice of drug for wet age-  
7 related macular degeneration, despite pressure from pharma. *BMJ* [Internet]. 2017 Oct  
8 31;359:j5013. Available from: <http://dx.doi.org/10.1136/bmj.j5013>  
9  
10 26. Lange C, Feltgen N, Junker B, et al. Resolving the clinical acuity categories “hand  
11 motion” and “counting fingers” using the Freiburg Visual Acuity Test (FrACT). *Graefes*  
12 *Arch Clin Exp Ophthalmol* [Internet]. 2009 Jan;247(1):137–42. Available from:  
13 <http://dx.doi.org/10.1007/s00417-008-0926-0>  
14  
15 27. RPB/Academy Award [Internet]. American Academy of Ophthalmology. 2017 [cited  
16 2018 Jun 24]. Available from: [https://www.aao.org/iris-registry/data-analysis/research-](https://www.aao.org/iris-registry/data-analysis/research-to-prevent-blindness-research-grants)  
17 [to-prevent-blindness-research-grants](https://www.aao.org/iris-registry/data-analysis/research-to-prevent-blindness-research-grants)  
18  
19 28. Arnold JJ, Campain A, Barthelmes D, et al. Two-Year Outcomes of “Treat and Extend”  
20 Intravitreal Therapy for Neovascular Age-Related Macular Degeneration.  
21 *Ophthalmology* [Internet]. 2015 Jun;122(6):1212–9. Available from:  
22 <http://linkinghub.elsevier.com/retrieve/pii/S0161642015001244>  
23  
24 29. Kim LN, Mehta H, Barthelmes D, et al. Metaanalysis of real-world outcomes of  
25 intravitreal ranibizumab for the treatment of neovascular age-related macular  
26 degeneration. *Retina* [Internet]. 2016 Aug;36(8):1418–31. Available from:  
27 <http://dx.doi.org/10.1097/IAE.0000000000001142>  
28  
29 30. Holz FG, Tadayoni R, Beatty S, et al. Key drivers of visual acuity gains in neovascular  
30 age-related macular degeneration in real life: findings from the AURA study. *Br J*  
31 *Ophthalmol* [Internet]. 2016 Dec;100(12):1623–8. Available from:  
32 <http://dx.doi.org/10.1136/bjophthalmol-2015-308166>  
33  
34 31. Sarwar S, Clearfield E, Soliman MK, et al. Aflibercept for neovascular age-related  
35 macular degeneration. *Cochrane Database Syst Rev* [Internet]. 2016 Feb  
36 8;2:CD011346. Available from: <http://dx.doi.org/10.1002/14651858.CD011346.pub2>  
37  
38 32. Lee AY, Lee CS, Egan CA, et al. UK AMD/DR EMR REPORT IX: comparative  
39 effectiveness of predominantly as needed (PRN) ranibizumab versus continuous  
40 aflibercept in UK clinical practice. *Br J Ophthalmol* [Internet]. 2017 Dec;101(12):1683–8.  
41 Available from: <http://dx.doi.org/10.1136/bjophthalmol-2016-309818>  
42  
43 33. Velilla S, García-Medina JJ, García-Layana A, et al. Smoking and age-related macular  
44 degeneration: review and update. *J Ophthalmol* [Internet]. 2013 Dec 4;2013:895147.  
45 Available from: <http://dx.doi.org/10.1155/2013/895147>  
46  
47 34. Gregori NZ, Feuer W, Rosenfeld PJ. Novel method for analyzing snellen visual acuity  
48 measurements. *Retina* [Internet]. 2010 Jul;30(7):1046–50. Available from:  
49 <http://dx.doi.org/10.1097/IAE.0b013e3181d87e04>  
50  
51  
52  
53  
54  
55  
56  
57  
58  
59  
60

## Figure legends

Figure 1: Visual acuity (A&C) and change in visual acuity (B&D) over time for all eyes and stratified by follow-up period (black: one year completers only; grey: two year completers). Bars represent 95% confidence intervals.

Figure 2: Percentage of eyes with good VA ( $\geq 70$  letters), intermediate VA (36-69 letters), and poor VA ( $\leq 35$  letters) at different follow-up times (A) and comparison of cohorts of different follow-up times at one year (B). VA - visual acuity

Figure 3: Change in visual acuity stratified by baseline VA (A), baseline age (B), and injection number at two years (C). Bars represent 95% confidence intervals.

1  
2  
3  
4  
5  
6  
7  
8  
9  
10  
11  
12  
13  
14  
15  
16  
17  
18  
19  
20  
21  
22  
23  
24  
25  
26  
27  
28  
29  
30  
31  
32  
33  
34  
35  
36  
37  
38  
39  
40  
41  
42  
43  
44  
45  
46  
47  
48  
49  
50  
51  
52  
53  
54  
55  
56  
57  
58  
59  
60

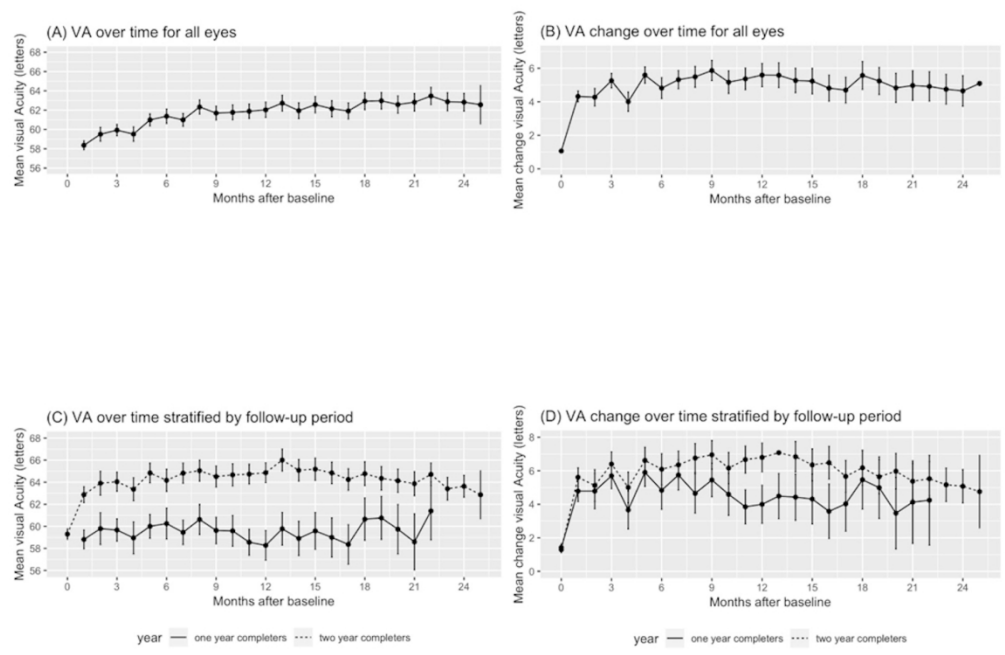

Figure 1: Visual acuity (A&C) and change in visual acuity (B&D) over time for all eyes and stratified by follow-up period (black: one year completers only; grey: two year completers). Bars represent 95% confidence intervals.

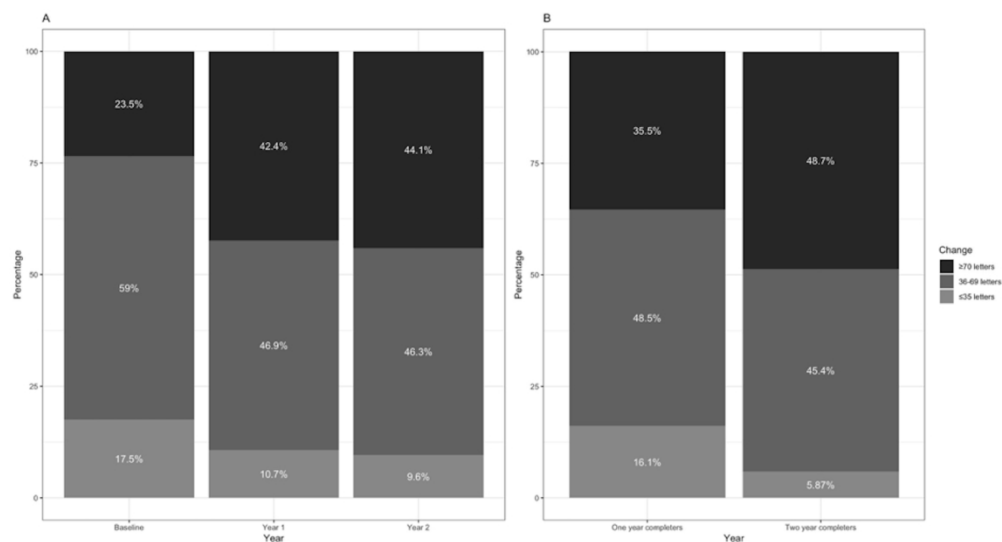

Figure 2: Percentage of eyes with good VA ( $\geq 70$  letters), intermediate VA (36-69 letters), and poor VA ( $\leq 35$  letters) at different follow-up times (A) and comparison of cohorts of different follow-up times at one year (B). VA - visual acuity

1  
2  
3  
4  
5  
6  
7  
8  
9  
10  
11  
12  
13  
14  
15  
16  
17  
18  
19  
20  
21  
22  
23  
24  
25  
26  
27  
28  
29  
30  
31  
32  
33  
34  
35  
36  
37  
38  
39  
40  
41  
42  
43  
44  
45  
46  
47  
48  
49  
50  
51  
52  
53  
54  
55  
56  
57  
58  
59  
60

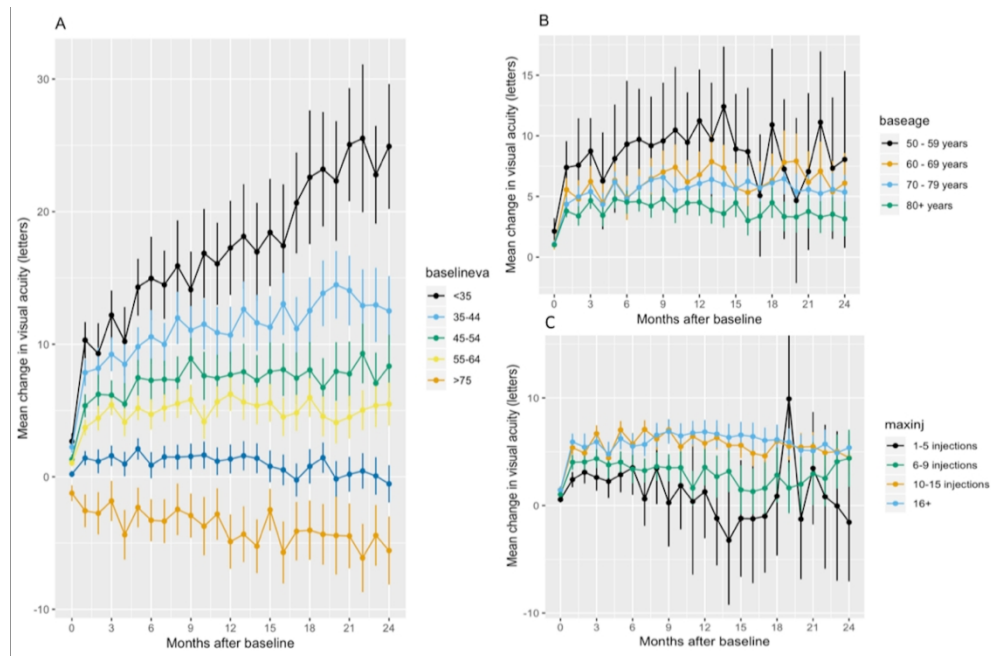

Figure 3: Change in visual acuity stratified by baseline VA (A), baseline age (B), and injection number at two years (C). Bars represent 95% confidence intervals.

# 1 Supplementary material

## 2 Supplementary 1: Data cleaning

3 **Manual data cleaning** was carried out according to the following rules:

4 VA: Missing or zero VA entries were manually checked in paper notes. If available from  
5 within 7 days before injection date, the respective VA was manually entered. Eyes with VA <  
6 25 letters (below National Institute for Health and Care Excellence criteria for treatment of  
7 neovascular AMD) at first presentation were checked manually. VA measured in Snellen  
8 were converted to ETDRS letters according to Gregori et. al.[35] Visual acuities below  
9 measurable ETDRS letters were converted to logMAR 2.0/-15 letters, logMAR 2.3/-30 letters  
10 and logMAR 2.7/-50 letters for count fingers, hand movements, and light perception  
11 respectively. Patient age: All patients <55 or >100 years of age at first presentation were  
12 checked manually to address misdiagnosis. Injection number: All eyes having received  $\geq 50$   
13 injections were manually checked to avoid errors of manual input of legacy injection  
14 numbers.

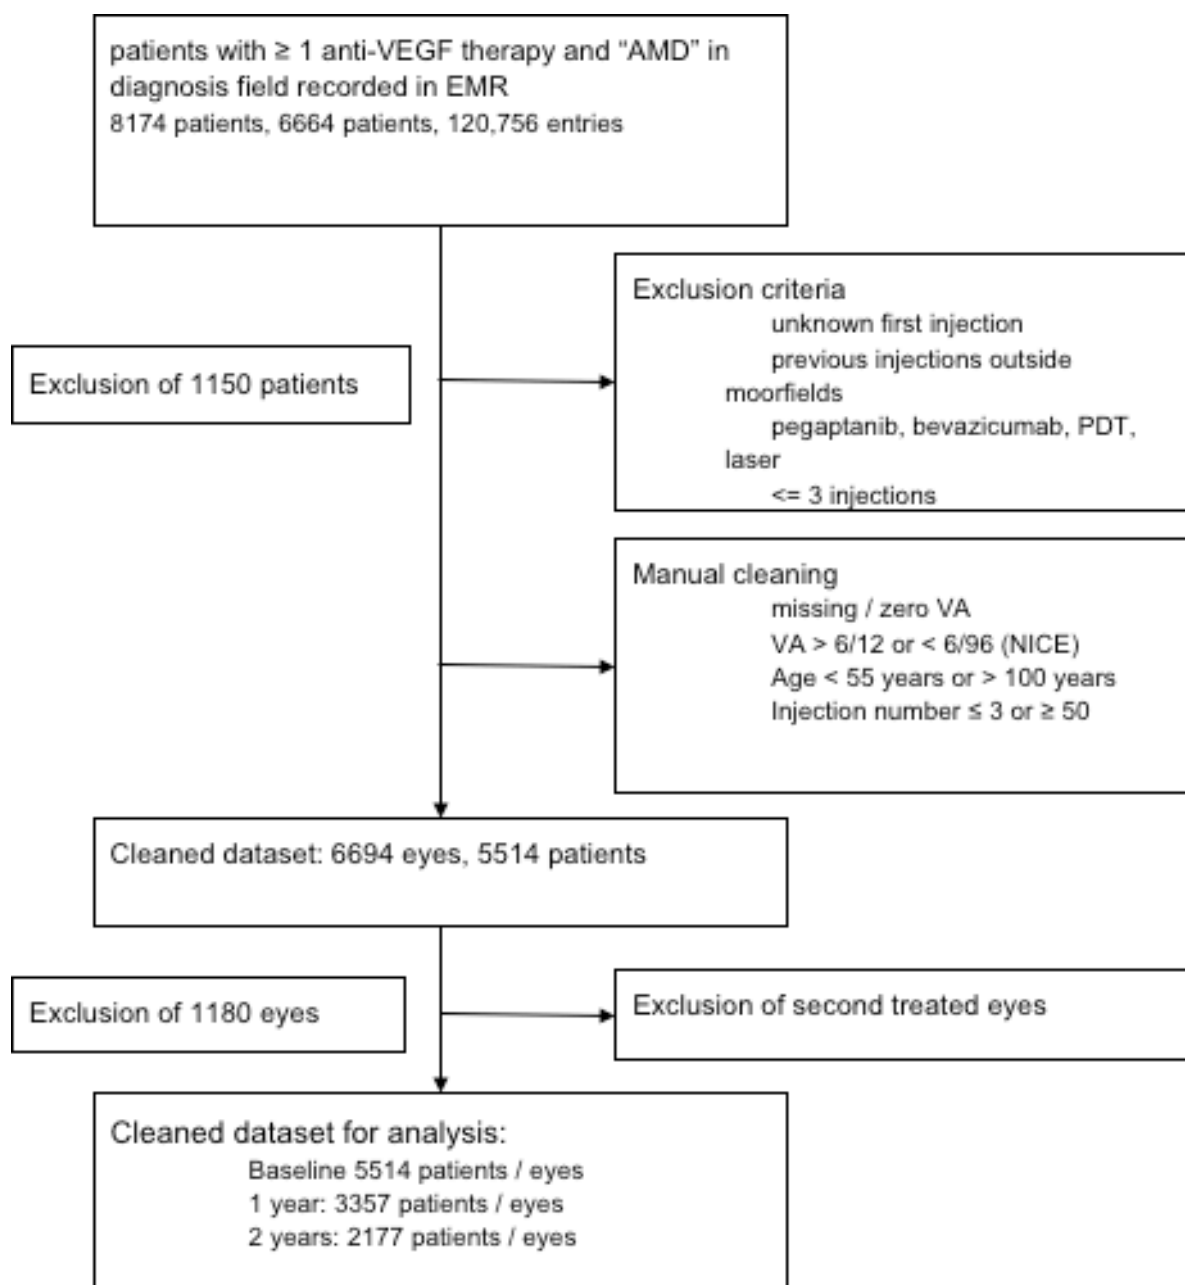

15

16 sFigure 1: Consort flow diagram data of data collection and cleaning

17 **Supplementary 2: Treatment guidelines for aflibercept**

18

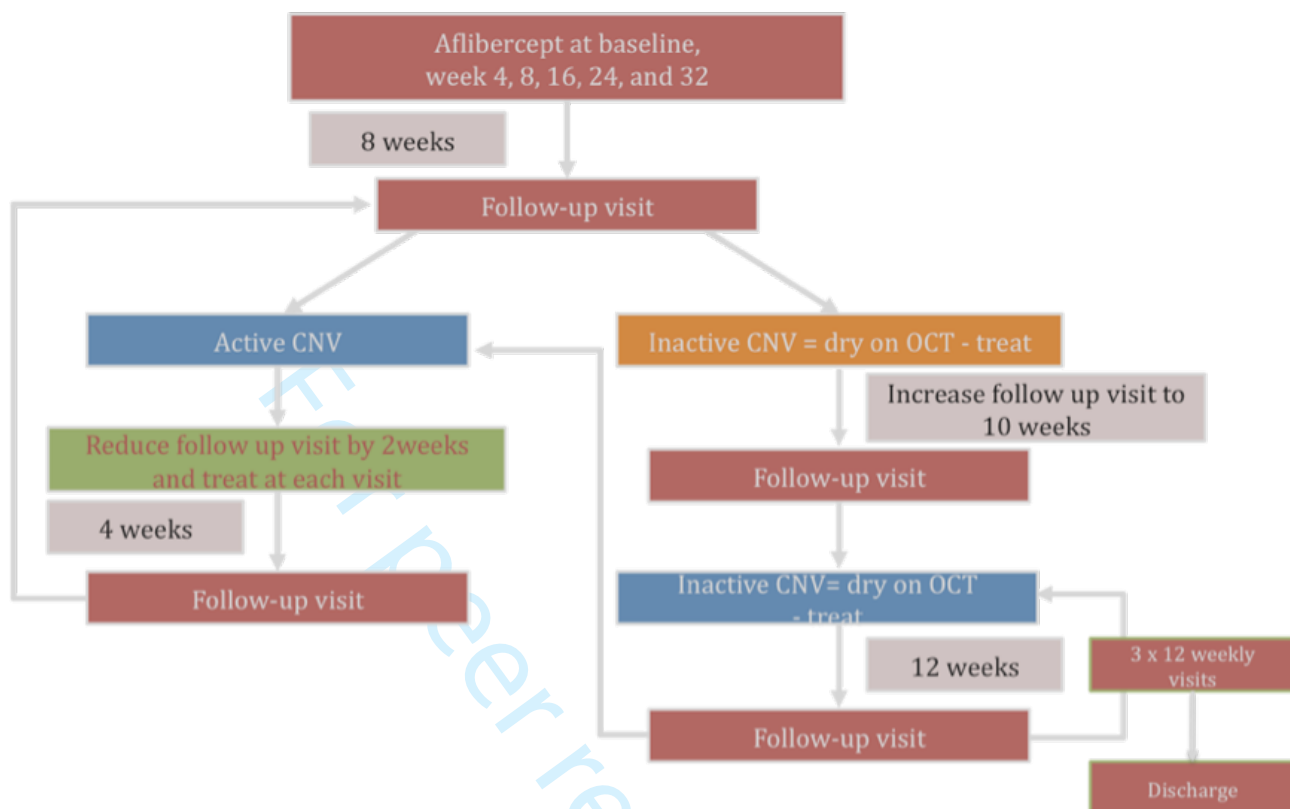

19

20

21

22

23

24

25

Figure 2: Treatment flow chart for aflibercept treatment in new cases of neovascular AMD at Moorfields Eye Hospital. Derived from *Guidelines for the intravitreal service for the treatment of age-related macular degeneration (version 2.0)*. AMD - Age related macular degeneration



# Reporting checklist for cohort study.

Based on the STROBE cohort guidelines.

## Instructions to authors

Complete this checklist by entering the page numbers from your manuscript where readers will find each of the items listed below.

Your article may not currently address all the items on the checklist. Please modify your text to include the missing information. If you are certain that an item does not apply, please write "n/a" and provide a short explanation.

Upload your completed checklist as an extra file when you submit to a journal.

In your methods section, say that you used the STROBE cohort reporting guidelines, and cite them as:

von Elm E, Altman DG, Egger M, Pocock SJ, Gøtzsche PC, Vandenbroucke JP. The Strengthening the Reporting of Observational Studies in Epidemiology (STROBE) Statement: guidelines for reporting observational studies.

|                        |     | Reporting Item                                                                                                                  | Page Number |
|------------------------|-----|---------------------------------------------------------------------------------------------------------------------------------|-------------|
| Title                  | #1a | Indicate the study's design with a commonly used term in the title or the abstract                                              | 5           |
| Abstract               | #1b | Provide in the abstract an informative and balanced summary of what was done and what was found                                 | 5           |
| Background / rationale | #2  | Explain the scientific background and rationale for the investigation being reported                                            | 8, 9        |
| Objectives             | #3  | State specific objectives, including any prespecified hypotheses                                                                | 9           |
| Study design           | #4  | Present key elements of study design early in the paper                                                                         | 10          |
| Setting                | #5  | Describe the setting, locations, and relevant dates, including periods of recruitment, exposure, follow-up, and data collection | 10, 11      |
| Eligibility criteria   | #6a | Give the eligibility criteria, and the sources and methods of selection of participants. Describe methods of follow-up.         | 10, 11      |
|                        | #6b | For matched studies, give matching criteria and number of exposed                                                               |             |

|    |                     |               |                                                                       |
|----|---------------------|---------------|-----------------------------------------------------------------------|
|    |                     | and unexposed |                                                                       |
| 1  |                     |               |                                                                       |
| 2  |                     |               |                                                                       |
| 3  | Variables           | #7            | Clearly define all outcomes, exposures, predictors, potential         |
| 4  |                     |               | confounders, and effect modifiers. Give diagnostic criteria, if       |
| 5  |                     |               | applicable                                                            |
| 6  |                     |               |                                                                       |
| 7  |                     |               |                                                                       |
| 8  | Data sources /      | #8            | For each variable of interest give sources of data and details of     |
| 9  | measurement         |               | methods of assessment (measurement). Describe comparability of        |
| 10 |                     |               | assessment methods if there is more than one group. Give              |
| 11 |                     |               | information separately for for exposed and unexposed groups if        |
| 12 |                     |               | applicable.                                                           |
| 13 |                     |               |                                                                       |
| 14 |                     |               |                                                                       |
| 15 |                     |               |                                                                       |
| 16 | Bias                | #9            | Describe any efforts to address potential sources of bias             |
| 17 |                     |               |                                                                       |
| 18 | Study size          | #10           | Explain how the study size was arrived at                             |
| 19 |                     |               |                                                                       |
| 20 |                     |               |                                                                       |
| 21 |                     |               | suppl. 1                                                              |
| 22 |                     |               |                                                                       |
| 23 | Quantitative        | #11           | Explain how quantitative variables were handled in the analyses. If   |
| 24 | variables           |               | applicable, describe which groupings were chosen, and why             |
| 25 |                     |               |                                                                       |
| 26 |                     |               |                                                                       |
| 27 | Statistical methods | #12a          | Describe all statistical methods, including those used to control for |
| 28 |                     |               | confounding                                                           |
| 29 |                     |               |                                                                       |
| 30 |                     |               |                                                                       |
| 31 |                     | #12b          | Describe any methods used to examine subgroups and interactions       |
| 32 |                     |               |                                                                       |
| 33 |                     | #12c          | Explain how missing data were addressed                               |
| 34 |                     |               | 11, 12                                                                |
| 35 |                     | #12d          | If applicable, explain how loss to follow-up was addressed            |
| 36 |                     |               | 14                                                                    |
| 37 |                     | #12e          | Describe any sensitivity analyses                                     |
| 38 |                     |               | 14                                                                    |
| 39 |                     |               |                                                                       |
| 40 | Participants        | #13a          | Report numbers of individuals at each stage of study—eg numbers       |
| 41 |                     |               | potentially eligible, examined for eligibility, confirmed eligible,   |
| 42 |                     |               | included in the study, completing follow-up, and analysed. Give       |
| 43 |                     |               | information separately for for exposed and unexposed groups if        |
| 44 |                     |               | applicable.                                                           |
| 45 |                     |               |                                                                       |
| 46 |                     |               |                                                                       |
| 47 |                     |               |                                                                       |
| 48 |                     | #13b          | Give reasons for non-participation at each stage                      |
| 49 |                     |               | 14                                                                    |
| 50 |                     | #13c          | Consider use of a flow diagram                                        |
| 51 |                     |               | Suppl.1                                                               |
| 52 |                     |               |                                                                       |
| 53 | Descriptive data    | #14a          | Give characteristics of study participants (eg demographic, clinical, |
| 54 |                     |               | social) and information on exposures and potential confounders.       |
| 55 |                     |               | Give information separately for exposed and unexposed groups if       |
| 56 |                     |               | applicable.                                                           |
| 57 |                     |               |                                                                       |
| 58 |                     |               |                                                                       |
| 59 |                     |               |                                                                       |
| 60 |                     |               |                                                                       |

|    |                  |      |                                                                          |       |
|----|------------------|------|--------------------------------------------------------------------------|-------|
| 1  |                  | #14b | Indicate number of participants with missing data for each variable      | 14    |
| 2  |                  |      | of interest                                                              |       |
| 3  |                  |      |                                                                          |       |
| 4  |                  |      |                                                                          |       |
| 5  |                  | #14c | Summarise follow-up time (eg, average and total amount)                  | 14    |
| 6  |                  |      |                                                                          |       |
| 7  | Outcome data     | #15  | Report numbers of outcome events or summary measures over time.          | 15    |
| 8  |                  |      | Give information separately for exposed and unexposed groups if          |       |
| 9  |                  |      | applicable.                                                              |       |
| 10 |                  |      |                                                                          |       |
| 11 |                  |      |                                                                          |       |
| 12 | Main results     | #16a | Give unadjusted estimates and, if applicable, confounder-adjusted        | 14-15 |
| 13 |                  |      | estimates and their precision (eg, 95% confidence interval). Make        |       |
| 14 |                  |      | clear which confounders were adjusted for and why they were              |       |
| 15 |                  |      | included                                                                 |       |
| 16 |                  |      |                                                                          |       |
| 17 |                  |      |                                                                          |       |
| 18 |                  |      |                                                                          |       |
| 19 |                  | #16b | Report category boundaries when continuous variables were                |       |
| 20 |                  |      | categorized                                                              |       |
| 21 |                  |      |                                                                          |       |
| 22 |                  |      |                                                                          |       |
| 23 |                  | #16c | If relevant, consider translating estimates of relative risk into        |       |
| 24 |                  |      | absolute risk for a meaningful time period                               |       |
| 25 |                  |      |                                                                          |       |
| 26 |                  |      |                                                                          |       |
| 27 | Other analyses   | #17  | Report other analyses done—e.g., analyses of subgroups and               | 15    |
| 28 |                  |      | interactions, and sensitivity analyses                                   |       |
| 29 |                  |      |                                                                          |       |
| 30 |                  |      |                                                                          |       |
| 31 | Key results      | #18  | Summarise key results with reference to study objectives                 | 16    |
| 32 |                  |      |                                                                          |       |
| 33 | Limitations      | #19  | Discuss limitations of the study, taking into account sources of         | 16-19 |
| 34 |                  |      | potential bias or imprecision. Discuss both direction and magnitude      |       |
| 35 |                  |      | of any potential bias.                                                   |       |
| 36 |                  |      |                                                                          |       |
| 37 |                  |      |                                                                          |       |
| 38 | Interpretation   | #20  | Give a cautious overall interpretation considering objectives,           | 16-19 |
| 39 |                  |      | limitations, multiplicity of analyses, results from similar studies, and |       |
| 40 |                  |      | other relevant evidence.                                                 |       |
| 41 |                  |      |                                                                          |       |
| 42 |                  |      |                                                                          |       |
| 43 |                  |      |                                                                          |       |
| 44 | Generalisability | #21  | Discuss the generalisability (external validity) of the study results    | 19    |
| 45 |                  |      |                                                                          |       |
| 46 | Funding          | #22  | Give the source of funding and the role of the funders for the present   | 2     |
| 47 |                  |      | study and, if applicable, for the original study on which the present    |       |
| 48 |                  |      | article is based                                                         |       |
| 49 |                  |      |                                                                          |       |
| 50 |                  |      |                                                                          |       |

51 The STROBE checklist is distributed under the terms of the Creative Commons Attribution License CC-BY.  
 52 This checklist was completed on 22. October 2018 using <http://www.goodreports.org/>, a tool made by the  
 53 [EQUATOR Network](#) in collaboration with [Penelope.ai](#)  
 54  
 55  
 56  
 57  
 58  
 59  
 60

# BMJ Open

## One and Two Year Visual Outcomes from the Moorfields Age-related Macular Degeneration Database – a retrospective Cohort Study and an Open Science Resource

|                                 |                                                                                                                                                                                                                                                                                                                                                                                                                                                                                                                                                                                                                                                                                                                                                                                                                                                                                                                                                                                                                                                                                                                                               |
|---------------------------------|-----------------------------------------------------------------------------------------------------------------------------------------------------------------------------------------------------------------------------------------------------------------------------------------------------------------------------------------------------------------------------------------------------------------------------------------------------------------------------------------------------------------------------------------------------------------------------------------------------------------------------------------------------------------------------------------------------------------------------------------------------------------------------------------------------------------------------------------------------------------------------------------------------------------------------------------------------------------------------------------------------------------------------------------------------------------------------------------------------------------------------------------------|
| Journal:                        | <i>BMJ Open</i>                                                                                                                                                                                                                                                                                                                                                                                                                                                                                                                                                                                                                                                                                                                                                                                                                                                                                                                                                                                                                                                                                                                               |
| Manuscript ID                   | bmjopen-2018-027441.R1                                                                                                                                                                                                                                                                                                                                                                                                                                                                                                                                                                                                                                                                                                                                                                                                                                                                                                                                                                                                                                                                                                                        |
| Article Type:                   | Research                                                                                                                                                                                                                                                                                                                                                                                                                                                                                                                                                                                                                                                                                                                                                                                                                                                                                                                                                                                                                                                                                                                                      |
| Date Submitted by the Author:   | 16-Apr-2019                                                                                                                                                                                                                                                                                                                                                                                                                                                                                                                                                                                                                                                                                                                                                                                                                                                                                                                                                                                                                                                                                                                                   |
| Complete List of Authors:       | Fasler, Katrin; Moorfields Eye Hospital NHS Foundation Trust, ; UniversitatsSpital Zurich Augenlinik und Poliklinik, Moraes, Gabriella; Moorfields Eye Hospital NHS Foundation Trust Wagner, Siegfried; Moorfields Eye Hospital NHS Foundation Trust Kortuem, Karsten; Moorfields Eye Hospital NHS Foundation Trust; Klinikum der Universitat Munchen Augenlinik Chopra, Reena; Moorfields Eye Hospital NHS Foundation Trust Faes, Livia; Moorfields Eye Hospital NHS Foundation Trust; Luzerner Kantonsspital Zentrumsspital Preston, Gabriella; Moorfields Eye Hospital NHS Foundation Trust Pontikos, Nikolas; Moorfields Eye Hospital NHS Foundation Trust Fu, Dun Jack; Moorfields Eye Hospital NHS Foundation Trust Patel, Praveen; NIHR Biomedical Research Centre at Moorfields Eye Hospital and UCL Institute of Ophthalmology, Tufail, Adnan; Moorfields Eye Hospital, Lee, Aaron; University of Washington, Department of Ophthalmology Balaskas, Konstantinos; Moorfields Eye Hospital NHS Foundation Trust; University of Manchester , School of Biological Sciences Keane, Pearse; Moorfields Eye Hospital NHS Foundation Trust |
| <b>Primary Subject Heading</b>: | Ophthalmology                                                                                                                                                                                                                                                                                                                                                                                                                                                                                                                                                                                                                                                                                                                                                                                                                                                                                                                                                                                                                                                                                                                                 |
| Secondary Subject Heading:      | Ophthalmology                                                                                                                                                                                                                                                                                                                                                                                                                                                                                                                                                                                                                                                                                                                                                                                                                                                                                                                                                                                                                                                                                                                                 |
| Keywords:                       | Age-related macular degeneration, Choroidal neovascularization, Anti-VEGF, Visual outcome, Electronic medical record, Real-world                                                                                                                                                                                                                                                                                                                                                                                                                                                                                                                                                                                                                                                                                                                                                                                                                                                                                                                                                                                                              |
|                                 |                                                                                                                                                                                                                                                                                                                                                                                                                                                                                                                                                                                                                                                                                                                                                                                                                                                                                                                                                                                                                                                                                                                                               |

SCHOLARONE™  
Manuscripts

1  
2  
3  
4  
5  
6  
7  
8  
9  
10  
11  
12  
13  
14  
15  
16  
17  
18  
19  
20  
21  
22  
23  
24  
25  
26  
27  
28  
29  
30  
31  
32  
33  
34  
35  
36  
37  
38  
39  
40  
41  
42  
43  
44  
45  
46  
47  
48  
49  
50  
51

# One and Two Year Visual Outcomes from the Moorfields Age-related Macular Degeneration Database – a retrospective Cohort Study and an Open Science Resource

Katrin Fasler,<sup>1,2</sup> Gabriella Moraes,<sup>1</sup> Siegfried K. Wagner,<sup>1</sup> Karsten U. Kortuem,<sup>1,3</sup>  
Reena Chopra,<sup>1</sup> Livia Faes,<sup>1,4</sup> Gabriella Preston,<sup>1</sup> Nikolas Pontikos,<sup>1</sup> Dun Jack Fu,<sup>1</sup>  
Praveen J. Patel,<sup>1</sup> Adnan Tufail,<sup>1</sup> Aaron Y. Lee,<sup>5</sup> Konstantinos Balaskas,<sup>1,6</sup> Pearse  
A. Keane <sup>1</sup>

<sup>1</sup> NIHR Biomedical Research Centre at Moorfields Eye Hospital NHS Foundation Trust and UCL  
Institute of Ophthalmology, London, UK.

<sup>2</sup> Department of Ophthalmology, University Hospital Zurich, Zurich, Switzerland.

<sup>3</sup> University Eye Hospital, Munich, Germany.

<sup>4</sup> Eye Clinic, Cantonal Hospital of Lucerne, Lucerne, Switzerland.

<sup>5</sup> Department of Ophthalmology, University of Washington, Seattle, USA.

<sup>6</sup> School of Biological Sciences, University of Manchester, Manchester, UK.

## Correspondence and reprint requests:

Pearse A. Keane, MD FRCOphth, NIHR Biomedical Research Centre for Ophthalmology, Moorfields  
Eye Hospital NHS Foundation Trust and UCL Institute of Ophthalmology, United Kingdom. Tel: +44  
Fax: +44 Email: pearse.keane1@nhs.net

## Disclosure / Funding:

This research received no specific grant from any funding agency in the public, commercial or not-for-profit sector.

## Competing interests:

There are no competing interests for any author.

1  
2  
3 **Running Head / Short title:**  
4  
5

6 The Moorfields AMD Database - Report 1  
7  
8  
9

10 **Keywords:**  
11  
12

13  
14 Age-related macular degeneration  
15

16 Choroidal neovascularization  
17

18 ranibizumab  
19

20 aflibercept  
21

22 Anti-VEGF  
23

24 Visual outcome  
25

26 Real-world  
27

28 Electronic medical record  
29  
30  
31

32 **Word Count:**  
33  
34

35  
36 Abstract - 292  
37

Main text - 2825  
38  
39

40 **Figures:**  
41  
42

43 3  
44  
45  
46

47 **Tables:**  
48  
49

50 1  
51  
52  
53

54 **Supplementary Material:**  
55  
56

57 4  
58  
59  
60

## Abbreviations:

AMD – age related macular degeneration

VEGF - vascular endothelial growth factor

VA - visual acuity

ETDRS - Early Treatment Diabetic Retinopathy Study

RCT - randomized controlled trial

LTFU - lost to follow-up

EMR - electronic medical record

NHS - National Health Service

ICHOM - International Consortium for Health Outcomes Measurement

FRB - Fight Retinal Blindness

CATT - Comparison of Age-related macular degeneration Treatment Trials

VIEW - Vascular endothelial growth factor Trap-Eye: Investigation of Efficacy and Safety in

Wet AMD study



## ABSTRACT

**Objectives:** To analyse treatment outcomes and share clinical data from a large, single-center, well-curated database (8174 eyes / 6664 patients with 120,756 single entries) of patients with neovascular age related macular degeneration (AMD) treated with anti-vascular endothelial growth factor (VEGF). By making our depersonalised raw data openly available, we aim to stimulate further research in AMD, as well as setting a precedent for future work in this area.

**Setting:** Retrospective, comparative, non-randomised electronic medical record (EMR) database cohort study of the UK Moorfields AMD database with data extracted between 2008 and 2018.

**Participants:** Including one eye per patient, 3357 eyes/patients (61% female). Extraction criteria were  $\geq 1$  ranibizumab or aflibercept injection, entry of "AMD" in the diagnosis field of the EMR, and a minimum of one year of follow-up. Exclusion criteria were unknown date of first injection and treatment outside of routine clinical care at Moorfields before the first recorded injection in the database.

**Main outcome measures:** Primary outcome measure was change in VA at one and two years from baseline as measured in Early Treatment Diabetic Retinopathy Study (ETDRS) letters. Secondary outcomes were the number of injections and predictive factors for VA gain.

**Results:** Mean VA gain at one-year and two years were +5.5 (95%CI:5.0,6.0) and +4.9 (95%CI:4.2,5.6) letters respectively. Fifty-four percent of eyes gained  $\geq 5$  letters at two years, 63% had stable VA ( $\pm \leq 14$  letters), forty-four percent of eyes maintained good VA ( $\geq 70$  letters). Patients received a mean of 7.7 (95%CI:7.6,7.8) injections during year one and 13.0

1  
2  
3 (95%CI:12.8,13.2) injections over two years. Younger age, lower baseline VA, and more  
4  
5  
6 injections were associated with higher VA gain at two years.  
7

8 **Conclusion:** This study benchmarks high quality EMR study results of real life AMD  
9  
10 treatment and promotes open science in clinical AMD research by making the underlying  
11  
12 data publicly available.  
13  
14  
15  
16  
17  
18  
19  
20  
21  
22  
23  
24  
25  
26  
27  
28  
29  
30  
31  
32  
33  
34  
35  
36  
37  
38  
39  
40  
41  
42  
43  
44  
45  
46  
47  
48  
49  
50  
51  
52  
53  
54  
55  
56  
57  
58  
59  
60

For peer review only

## Strengths and limitations of this study

- Large sample size, retrospective, single centre, electronic medical record database study
- High quality real life data
- Open science approach with sharing of depersonalised raw data

For peer review only

## INTRODUCTION

The treatment of neovascular age-related macular degeneration (AMD) has been revolutionised by the development of anti-vascular endothelial growth factor (VEGF) agents such as ranibizumab and aflibercept.(1–4) Unfortunately, real world results from retrospective studies are typically inferior to those from randomised controlled trials (RCTs), with fewer administered injections and significant inter-country and inter-center differences in therapy administration and outcomes.(5–9) Although retrospective studies and audits may be more likely than RCTs to reflect results in clinical practice, they still are not truly representative of outcomes in real world populations.(5–7,10,11) Major drawbacks of retrospective study designs are small sample sizes with selection bias and sub-optimal methods for handling of both missing data and losses to follow-up (LTFU).(11,12) Survival bias in particular can lead to skewed results: omission of cases LTFU from the analysis leads to selection of a non-random cohort with potential overestimation of visual acuity (VA) gains through exclusion of patients that stop treatment early due to irreversible visual loss such as foveal scarring or other adverse effects.(12)

The advent of electronic medical records (EMR) has facilitated the collection of large amounts of data in routine clinical practice and thus has the potential to make retrospective study populations more representative of real life.(13–18) This is very much dependent, however, on the quality of data entry and the reliable follow-up of patients, and so these issues can remain problematic. The amount of data available from EMR systems also challenges the traditional methods of validation, analytics and reporting, and there is a struggle to implement the existing clinical research guidelines.(12,19–21) For example, in 2015, the RECORD statement highlighted the challenges of using routinely collected observational health data.(21) A further problem is the variation of data collection in the different EMR registers in different hospitals and countries. The International Consortium for Health Outcomes Measurement (ICHOM) AMD working group has also proposed a standard set of clinical characteristics, interventions, and outcomes including preferential methods of

1  
2  
3 VA recording (logarithm of the minimum angle of resolution or Early Treatment Diabetic  
4 Retinopathy Study (ETDRS) letters).(22)  
5  
6

7 At Moorfields Eye Hospital, an EMR was initiated in October 2008, and its successor,  
8 OpenEyes™, was implemented in September 2012. Subsequently, data from both systems  
9 were merged into the current centralised repository, the data warehouse. We have created a  
10 dataset from this which represents, to our knowledge, the largest single-center cohort of  
11 patients receiving treatment for neovascular AMD in the world. This Moorfields AMD dataset  
12 is increasing steadily, with 909 new patients in 2017 alone, a number typically only  
13 comparable in magnitude to multicenter studies.(14,16) Apart from its sheer size, key  
14 advantages of this dataset include the ability to clean and validate data directly, the  
15 completeness due to the mandatory input of relevant fields including VA, the consistency of  
16 VA measurements in ETDRS letters, the lack of requirement to merge data from different  
17 sites and systems, the standardised treatment scheme following national guidelines, and the  
18 ability to directly access the raw imaging data from each study visit.  
19  
20  
21  
22  
23  
24  
25  
26  
27  
28  
29  
30  
31

32 The aim of this study is to analyse one- and two-year VA outcomes, determine  
33 predictive factors of VA gain in treatment-naive eyes from the Moorfields AMD database,  
34 and to aid in scientific progress by making the de-personalised raw data from our study  
35 openly available to the research community.(21,23)  
36  
37  
38  
39  
40  
41  
42  
43  
44  
45  
46  
47  
48  
49  
50  
51  
52  
53  
54  
55  
56  
57  
58  
59  
60

## METHODS

### Data Collection:

Data for this retrospective, comparative, non-randomised cohort study were extracted from the data warehouse, the centralised storage for all EMR data, of Moorfields Eye Hospital. Data were extracted between October 21, 2008 and August 08, 2018. Extraction criteria were  $\geq 1$  ranibizumab or aflibercept injection, entry of "AMD" in the diagnosis field of the EMR, and a minimum of one year of follow-up. Exclusion criteria were unknown date of first injection, any treatment outside of routine clinical care at Moorfields before the first recorded injection in the database, including pegaptanib, previous laser or photodynamic therapy, and bevacizumab. The rationale for exclusion of bevacizumab is that in the National Health Service (NHS), neovascular AMD is generally treated with the licensed therapeutics ranibizumab or aflibercept, and not with the off-label bevacizumab.(24,25) The date of the first injection was defined as the baseline date. The dataset has been depersonalised for publication and approval for data collection and analysis was obtained from the Institutional Review Board at Moorfields (ROAD17/031). The study adhered to the tenets set forth in the Declaration of Helsinki.

### Outcome Measures:

The primary outcomes were mean change in VA from baseline as measured in ETDRS letters, proportion of eyes gaining  $\geq 5$  letters, proportion of eyes with stable vision (change in VA  $<15$  letters to baseline), proportion of eyes with good vision ( $\geq 20/40$  or 70 letters), and proportion of eyes with poor vision ( $\leq 20/200$  or 35 letters) at baseline, year one, and year two. Those endpoints have been used in the pivotal trials and/or have been included in the

1  
2  
3 ICHOM reporting recommendations.(1–4,22) Secondary outcomes included the number of  
4  
5  
6 injections, and effect of baseline characteristics and injection numbers on changes in VA.  
7  
8 Definitions for one-year and two-year outcome dates were taken from previous real-world  
9  
10 studies as visits closest to 52 weeks and 104 weeks post baseline date within  $\pm 8$   
11  
12 weeks.(6,13) We used the STROBE cohort checklist when writing our report.(20)  
13  
14  
15

### 16 **Efforts to Minimize Bias:**

17  
18  
19 Clinical information from patients with neovascular AMD is manually entered to the  
20  
21 Moorfields Eye Hospital EMR (OpenEyes™) at each visit. The EMR requires mandatory  
22  
23 completion for a number of fields at each patient visit, including VA, central retinal thickness,  
24  
25 treatment decision, treatment drug, and injection number, thus minimizing the number of  
26  
27 missing data entries. Of all 120,756 single entries, missing / zero visual acuity  
28  
29 measurements were encountered in 4059 (4.1%) of all entries. After manual cleaning of all  
30  
31 4059 missing entries, missing data accounted for 808 (0.9%) entries. Patients aged <55 or  
32  
33 >100 and eyes with injection numbers  $\geq 50$  were manually checked. Description of manual  
34  
35 cleaning including a CONSORT diagram is shown in supplementary material  
36  
37  
38  
39  
40  
41 (Supplementary 1, sFigure 1). Visual acuities below measurable ETDRS letters were  
42  
43 converted to logMAR 2.0/-15 letters, logMAR 2.3/-30 letters and logMAR 2.7/-50 letters for  
44  
45 count fingers, hand movements, and light perception respectively.(26) To avoid bias due to  
46  
47 inter-eye correlation, statistical analysis was restricted to one eye per patient, i.e. the first  
48  
49 eye of a patient if sequentially treated, and a randomly selected eye if simultaneously  
50  
51 treated. Outcomes of second-treated fellow eyes will be reported separately.  
52  
53  
54  
55  
56  
57  
58  
59  
60

### Statistical Analysis:

The data were analysed using the statistics software R (<https://www.r-project.org/>; provided in the public domain by R Core team 2017 R Foundation for Statistical Computing, Vienna, Austria).

The ggplot2 package was used for plots. The eye was defined as unit of analysis. Descriptive statistics included mean +/- 95% confidence interval (CI), and median, where appropriate.

Differences between groups were evaluated using Mann Whitney U test and Pearson Chi-Square. Multivariate linear regression analysis was performed to assess relationship of predictive factors and VA change. Independent variables used included gender, baseline age, baseline VA, and injection number. VA change at 1 and 2 years following initiation of treatment were each interrogated as the dependent variable. A p-value < 0.05 was considered significant.

### Patient and Public Involvement:

Patients and public were not involved in the study as this was a retrospective cohort study.

### Data Sharing Statement:

Data available from the Dryad Digital Repository: <https://doi.org/10.5061/dryad.97r9289>



## RESULTS

### Patient Demographics:

The full dataset consisted of 8174 treatment-naïve eyes/6664 patients with 120,756 single entries treated for neovascular AMD in the Moorfields database between October 21, 2008 and August 9, 2018.

The dataset for analysis consisted of 3357 eyes/patients (61% female). Mean age was 78 (95%CI:77.7,78.3) years at baseline. Mean VA was 56.2 (95%CI:55.6,56.8) letters. Of these, 1105 eyes (33%) were treated with ranibizumab, 1533 (46%) with aflibercept, and 719 eyes (21%) were treated with both ranibizumab and aflibercept. The starting year of treatment ranged between 2007-2018. Therapeutic choices at Moorfields Eye Hospital changed after 2013 and both ranibizumab and aflibercept were offered as alternative first line agents. After this change, a number of patients were switched from one agent to another resulting in over 50% of eyes in the full dataset receiving both drugs during the course of treatment. Baseline characteristics are shown in Table 1.

1  
2  
3  
4  
5  
6  
7  
8  
9  
10  
11  
12  
13  
14  
15  
16  
17  
18  
19  
20  
21  
22  
23  
24  
25  
26  
27  
28  
29  
30  
31  
32  
33  
34  
35  
36  
37  
38  
39  
40  
41  
42  
43  
44  
45  
46  
47  
48  
49  
50  
51  
52  
53  
54  
55  
56  
57  
58  
59  
60

|                                                    | Baseline characteristics | One year outcomes |                     |                                  |                     | Two year outcomes |
|----------------------------------------------------|--------------------------|-------------------|---------------------|----------------------------------|---------------------|-------------------|
|                                                    |                          | Full cohort       | One year completers | One year vs. two year completers | Two year completers |                   |
| Number of eyes / patients                          | 3357                     | 3357              | 1601                |                                  | 1756                | 2177              |
| Mean baseline age (years) (95%CI)                  | 78 (77.7, 78.3)          | 78 (77.7, 78.3)   | 79 (78.7, 79.3)     | p<0.001                          | 77 (76.6, 77.4)     | 77 (76.6, 77.4)   |
| Gender female / male                               | 61 / 39                  | 61 / 39           | 61 / 39             |                                  | 61 / 39             | 61 / 39           |
| Mean baseline VA (letters) (95%CI)                 | 56.2 (55.6, 56.8)        | 56.2 (55.6, 56.8) | 54.4 (53.8, 55.0)   | p<0.001                          | 57.9 (57.2, 58.6)   | 57.8 (57.1, 58.5) |
| Mean VA (letters) (95%CI)                          | 56.2 (55.6, 56.8)        | 61.8 (61.2, 62.4) | 58.5 (57.9, 59.1)   | p<0.001                          | 64.8 (64.1, 65.5)   | 62.7 (62.0, 63.4) |
| Mean change in VA (letters) (95%CI)                |                          | 5.5 (5.0, 6.0)    | 4.1 (3.6, 4.6)      | p<0.001                          | 6.8 (6.1, 7.5)      | 4.9 (4.2, 5.6)    |
| % of eyes gaining $\geq 5$ letters                 |                          | 54%               | 51%                 | p<0.001                          | 58%                 | 54%               |
| % of eyes with stable vision ( $\pm < 15$ letters) |                          | 66%               | 65%                 | p=0.378                          | 66%                 | 63%               |
| % of eyes with good VA ( $\geq 20/40$ )            | 24%                      | 42%               | 35%                 | p<0.001                          | 49%                 | 44%               |
| % of eyes with poor VA ( $\leq 20/200$ )           | 17%                      | 11%               | 16%                 | p<0.001                          | 6%                  | 10%               |
| Mean injection number (95%CI) over time            |                          | 7.7 (7.6, 7.8)    | 7.5 (7.4, 7.6)      | p<0.001                          | 8.0 (7.8, 8.2)      | 13.0 (12.8, 13.2) |

Table 1: Baseline characteristics, one and two year outcomes, VA - visual acuity, CI - 95% confidence interval.

Distribution of data was tested by the Shapiro-Wilk normality test. Means of non-parametric, paired groups were compared using Wilcoxon Signed-rank test.

Of the 1162 patients not completing the two year follow-up date, 254 patients had died. LTFU occurred in 27% of eyes for two year follow-up. To address the potentially

1  
2  
3 resulting survival bias of, one-year outcomes for the cohort not completing 2-year follow-up  
4 and the cohort completing the 2-year follow-up are shown.  
5  
6  
7

### 8 9 **Visual outcomes at one and two years**

10  
11 Mean VA gain at one and two years were +5.5 (95%CI:5.0,6.0) and +4.9 (95%CI:4.2,5.6)  
12 letters respectively. The mean number of injections over the first year and first two years  
13 were 7.7 (95%CI:7.6,7.8) and 13.0 (95%CI:12.8,13.2) respectively (Figure 1). Percentages  
14 of eyes gaining vision (change in VA  $\geq 5$  letters), stable vision (change in VA  $< 15$  letters),  
15 good vision (VA  $\geq 70$  letters/ $> 20/40$ ), and poor vision (VA  $\leq 35$  letters/ $\leq 20/200$ ) are shown in  
16 Table 1 and Figure 2.  
17  
18  
19  
20  
21  
22  
23

24 Comparison of subgroups that did not complete the two-year follow-up and the cohort  
25 that did complete the two-year follow-up showed a significantly lower mean baseline VA for  
26 those with a follow-up of less than two years (54.4 vs. 57.9 letters,  $p < 0.05$ ) a lower mean  
27 gain of letters (4.1 vs. 6.8 letters,  $p < 0.05$ ) as well as a lower injection frequency (7.5 vs. 8.0,  
28  $p < 0.05$ ) at one year.  
29  
30  
31  
32  
33  
34  
35

### 36 **Determinants of change in VA at one and two years**

37  
38 Age at presentation, VA at presentation, and injection number have each been shown  
39 independently to correlate with VA outcomes eyes with neovascular AMD receiving anti-  
40 VEGF therapy (12). We therefore wanted to assess whether these parameters would  
41 correlate with 1- and 2-year VA outcomes in our cohort.  
42  
43  
44  
45  
46

47 We carried out multiple linear regression analyses of the clinical variables (gender, baseline  
48 age, baseline VA, injection number) with VA change at 1-year (Supplementary 2, sTable 1)  
49 and 2-years (Supplementary 2 sTable 2) following baseline as dependent variables.  
50  
51  
52  
53

54 Regression models were statistically significant and suggest that a lower baseline VA, lower  
55 baseline age and higher injection number are independently associated with a higher VA  
56 change at year one and two. Indeed, this is the trend demonstrated when VA change over  
57 the observation period is stratified by baseline age and VA (Figure 3).  
58  
59  
60

## DISCUSSION

In this study, we show that patients treated with ranibizumab and/or aflibercept for neovascular AMD at Moorfields Eye Hospital achieve good visual outcomes, particularly those patients who present at an earlier age with better visual acuity, and who subsequently receive frequent intravitreal injections.

The Moorfields AMD Database is a large, consistent, and clean dataset of neovascular AMD treatment and visual outcomes, perhaps the largest single-center dataset of its kind worldwide. We have made this freely available to download with this manuscript in an effort to benefit the AMD research community. At a minimum, this will allow for use of alternative statistical approaches and facilitate research reproducibility. (21) We also hope it will allow for the testing of new hypotheses and thus provide new insights into the treatment of this condition.(27) We have also developed systems so that the Moorfields AMD Database is automatically updated over time, with minimal need for manual cleaning of data. Just under 1000 new cases of neovascular AMD present to Moorfields Eye Hospital on a yearly basis - this may be particularly useful as new therapeutics for AMD continue to be introduced. Additionally, we plan on releasing data for long-term follow-up of these (five years and beyond), as well as their associated raw imaging data (colour fundus photography and optical coherence tomography (OCT) in every eye at every visit).

At one and two years, our results of mean VA gains confirm the existing evidence in real-life studies, e.g., the Fight Retinal Blindness (FRB) group in Australia/New Zealand for ranibizumab/aflibercept with nearly identical baseline characteristics and visual acuity outcomes for mixed ranibizumab/aflibercept treatment (Supplementary 3, sTable 3).(10,28)

However, VA gains reported by the Writing Committee for the UK Age-Related Macular Degeneration EMR Users Group are considerably poorer which likely is explained by the reported capacity constraints resulting in reduced treatment frequency of with a mean

1  
2  
3 of 9.4 injections over 2 years versus over 13 in our cohort and the FRB.(16) VA results from  
4 randomised prospective studies (e.g., the Comparison of Age-related macular degeneration  
5 Treatment Trials (CATT) and Vascular endothelial growth factor Trap-Eye: Investigation of  
6 Efficacy and Safety in Wet AMD study (VIEW)) have been shown to be superior to  
7 retrospective real-life data.(1,4)  
8  
9  
10  
11  
12

13  
14 This is also reflected in our data and is explained by the broader inclusion criteria,  
15 and the less strict treatment regimens with fewer administered injections. Comparison of  
16 cohorts that completed only one year of follow-up versus two or more years showed that  
17 eyes with shorter follow-up were older, had lower baseline VA, gained fewer letters at the  
18 one year follow-up, and received fewer injections over the first year. The loss to follow-up  
19 reflects the real-life setting of the study where patients transfer to stable AMD clinics, their  
20 vision has deteriorated and rendered further treatment unreasonable, or they are not able to  
21 further attend clinics. We deliberately did not perform any imputational replacement of  
22 missing data, but clearly describe the baseline characteristics and compare the one year  
23 results of the cohort LTFU before two years.(12)  
24  
25  
26  
27  
28  
29  
30  
31  
32  
33  
34

35 VA gain over time is dependent on baseline characteristics and injection  
36 frequency.(12,14,29) Increasing age diminishes the VA gain expected as does a higher  
37 baseline acuity due to ceiling effect.(30) Baseline VA could even emerge as a surrogate  
38 measure for accessibility to treatment and quality of care, since simply looking at VA gains  
39 would underestimate centers that achieve short time from diagnosis to first treatment  
40 resulting in above average baseline VA but ceiling effect on VA gains.(8,12,16) Injection  
41 frequency has been recognised as another significant factor influencing VA gain and has  
42 been hypothesised to be the major factor in studies comparing ranibizumab and aflibercept  
43 due to the change in posology from treatment as needed to treat-and-extend concomitant  
44 with the change from ranibizumab to aflibercept in clinical practice.(14,29,31,32).  
45  
46  
47  
48  
49  
50  
51  
52  
53  
54  
55

56 The retrospective nature and EMR-based data collection of our study introduce  
57 several limiting factors. Smoking status of our patients was not consistently available and  
58 thus, could not be included in the prediction model. Smoking has been identified as a risk  
59  
60

1  
2  
3 factor for the development of neovascular AMD, but might also impact treatment  
4  
5 response.(33) There is invariably survival bias within the data, as LTFU cannot be assumed  
6  
7 to occur at random. However, baseline characteristics of LTFU as well as differences in  
8  
9 outcomes for one and two year follow-up cohorts have been clearly described to address  
10  
11 this. To date, there is no systematic collection of patient-reported outcome measures  
12  
13 (mobility and independence, emotional well-being, as well as reading and accessing  
14  
15 information questionnaires) as suggested by ICHOM.(22) EMR studies introduce new  
16  
17 challenges to medical research: Data quality issues, hidden in large datasets, could lead to  
18  
19 false interpretation, i.e. “garbage in – garbage out”, lack of computer science skills may limit  
20  
21 reproducibility of research results, and sharing of medical data poses legal issues.(12, 34,  
22  
23 20-21). Our study addresses this with a transparent, STROBE statement conforming  
24  
25 structure, and an open science approach with information governance approved  
26  
27 depersonalized data sharing.  
28  
29

30  
31 The main advantages of this study are the quality and amount of data coming from  
32  
33 one single center and one database. Moorfields Eye Hospital has a standardised treatment  
34  
35 protocol for neovascular AMD, formerly treatment as needed, and fixed-first year/treat-and  
36  
37 extend regimen with the introduction of aflibercept in 2014 (flow chart for aflibercept use is  
38  
39 shown in Supplementary 4, sFigure 2). The extensive manual cleaning and the  
40  
41 homogeneous standards of data input (VA in ETDRS letters, mandatory fields) have formed  
42  
43 a highly reliable resource which will be enhanced in the future with an automated update and  
44  
45 validation to allow for continued growth and quality improvement of clinical AMD data.  
46  
47

48  
49 In conclusion, this study shows that with a diligent approach, analysis of well  
50  
51 maintained EMR data can lead to high quality real-life results and electronic availability of  
52  
53 data facilitates maximisation of its potential in sharing research resources with the  
54  
55 community, ultimately with the goal of improving patient care in real-life. In the near future,  
56  
57 we plan to report on long-term visual outcomes (e.g., after 5-years), anatomic outcomes, and  
58  
59 fellow-eye involvement, as well as the differential therapeutic effects of ranibizumab and  
60  
aflibercept. In each case, we plan to release the raw data that underpins these reports - we

1  
2  
3 hope that this will help promote an open-science approach to the study of neovascular AMD,  
4  
5 and thus to direct patient benefit in the longer term.  
6  
7  
8

## 9 **Author / contributorship statement**

10  
11  
12  
13 Katrin Fasler has drafted the manuscript and contributed to data acquisition,  
14  
15 analysis, and interpretation of data. She is accountable for all aspects of the work  
16  
17 and has approved for the final version to be published.  
18

19  
20 Siegfried K. Wagner and Karsten U. Kortuem have contributed in design of  
21  
22 the study, interpretation of data as well as critical revision of the manuscript. They  
23  
24 share accountability for all aspects of the work and have approved for the final  
25  
26 version to be published.  
27

28  
29 Livia Faes, Dun Jack Fu, and Aaron Y. Lee have contributed to analysis and  
30  
31 interpretation of the data and critical revision of the manuscript. They share  
32  
33 accountability for all aspects of the work and have approved for the final version to  
34  
35 be published.  
36

37  
38 Gabriella Moraes, Gabriella Preston, Reena Chopra, and Nikolas Pontikos  
39  
40 have contributed to acquisition of data and critical revision of the manuscript. They  
41  
42 share accountability for all aspects of the work and have approved for the final  
43  
44 version to be published.  
45

46  
47 Konstantinos Balaskas, Praveen J. Patel, Adnan Tufail, and Pearse A. Keane  
48  
49 have contributed to conception of the work, interpretation of data and critical revision  
50  
51 of the manuscript. They share accountability for all aspects of the work and have  
52  
53 approved for the final version to be published.  
54  
55  
56  
57  
58  
59  
60

1  
2  
3  
4  
5  
6  
7  
8  
9  
10  
11  
12  
13  
14  
15  
16  
17  
18  
19  
20  
21  
22  
23  
24  
25  
26  
27  
28  
29  
30  
31  
32  
33  
34  
35  
36  
37  
38  
39  
40  
41  
42  
43  
44  
45  
46  
47  
48  
49  
50  
51  
52  
53  
54  
55  
56  
57  
58  
59  
60

For peer review only



## REFERENCES

1. Martin DF, Maguire MG, Fine SL, et al. Ranibizumab and Bevacizumab for Treatment of Neovascular Age-related Macular Degeneration. *Ophthalmology* [Internet]. 2012 Jul;119(7):1388–98. Available from: <http://linkinghub.elsevier.com/retrieve/pii/S0161642012003211>
2. Brown DM, Michels M, Kaiser PK, et al. Ranibizumab versus verteporfin photodynamic therapy for neovascular age-related macular degeneration: Two-year results of the ANCHOR study. *Ophthalmology* [Internet]. 2009 Jan;116(1):57–65.e5. Available from: <http://dx.doi.org/10.1016/j.ophtha.2008.10.018>
3. Rosenfeld PJ, Brown DM, Heier JS, et al. Ranibizumab for neovascular age-related macular degeneration. *N Engl J Med* [Internet]. 2006 Oct 5;355(14):1419–31. Available from: <http://dx.doi.org/10.1056/NEJMoa054481>
4. Heier JS, Brown DM, Chong V, et al. Intravitreal aflibercept (VEGF trap-eye) in wet age-related macular degeneration. *Ophthalmology* [Internet]. 2012 Dec;119(12):2537–48. Available from: <http://dx.doi.org/10.1016/j.ophtha.2012.09.006>
5. Holz FG, Tadayoni R, Beatty S, et al. Multi-country real-life experience of anti-vascular endothelial growth factor therapy for wet age-related macular degeneration. *Br J Ophthalmol* [Internet]. 2015 Feb;99(2):220–6. Available from: <http://dx.doi.org/10.1136/bjophthalmol-2014-305327>
6. Cohen SY, Mimoun G, Oubraham H, et al. Changes in visual acuity in patients with wet age-related macular degeneration treated with intravitreal ranibizumab in daily clinical practice: the LUMIERE study. *Retina* [Internet]. 2013 Mar;33(3):474–81. Available from: <http://dx.doi.org/10.1097/IAE.0b013e31827b6324>
7. Finger RP, Wiedemann P, Blumhagen F. Treatment patterns, visual acuity and quality-of-life outcomes of the WAVE study—A noninterventional study of ranibizumab treatment for neovascular age related macular degeneration in Germany. *Acta* [Internet]. 2013; Available from: <http://onlinelibrary.wiley.com/doi/10.1111/j.1755-3768.2012.02493.x/full>
8. Liew G, Lee AY, Zarranz-Ventura J, et al. The UK Neovascular AMD Database Report 3: inter-centre variation in visual acuity outcomes and establishing real-world measures of care. *Eye* [Internet]. 2016 Nov;30(11):1462–8. Available from: <http://dx.doi.org/10.1038/eye.2016.149>
9. Eleftheriadou M, Gemenetzi M, Lukic M, et al. Three-Year Outcomes of Aflibercept Treatment for Neovascular Age-Related Macular Degeneration: Evidence from a Clinical Setting. *Ophthalmol Ther* [Internet]. 2018 Jul 7; Available from: <http://dx.doi.org/10.1007/s40123-018-0139-5>
10. Barthelmes D, Nguyen V, Daien V, et al. Two year outcomes of “treat and extend” intravitreal therapy using aflibercept preferentially for neovascular age-related macular degeneration. *Retina* [Internet]. 2018 Jan;38(1):20–8. Available from: <http://dx.doi.org/10.1097/IAE.0000000000001496>
11. Chong V. Ranibizumab for the treatment of wet AMD: a summary of real-world studies. *Eye* [Internet]. 2016 Feb;30(2):270–86. Available from: <http://dx.doi.org/10.1038/eye.2015.217>

12. Mehta H, Tufail A, Daien V, et al. Real-world outcomes in patients with neovascular age-related macular degeneration treated with intravitreal vascular endothelial growth factor inhibitors. *Prog Retin Eye Res* [Internet]. 2018 Jan 2; Available from: <http://dx.doi.org/10.1016/j.preteyeres.2017.12.002>
13. Lotery A, Griner R, Ferreira A, et al. Real-world visual acuity outcomes between ranibizumab and aflibercept in treatment of neovascular AMD in a large US data set. *Eye* [Internet]. 2017 Dec;31(12):1697–706. Available from: <http://dx.doi.org/10.1038/eye.2017.143>
14. Rao P, Lum F, Wood K, et al. Real-World Vision in Age-Related Macular Degeneration Patients Treated with Single Anti-VEGF Drug Type for 1 Year in the IRIS Registry. *Ophthalmology* [Internet]. 2017 Nov 13; Available from: <http://dx.doi.org/10.1016/j.ophtha.2017.10.010>
15. Almuhtaseb H, Johnston RL, Talks JS, et al. Second-year visual acuity outcomes of nAMD patients treated with aflibercept: data analysis from the UK Aflibercept Users Group. *Eye* [Internet]. 2017 Nov;31(11):1582–8. Available from: <http://dx.doi.org/10.1038/eye.2017.108>
16. Writing Committee for the UK Age-Related Macular Degeneration EMR Users Group. The neovascular age-related macular degeneration database: multicenter study of 92 976 ranibizumab injections: report 1: visual acuity. *Ophthalmology* [Internet]. 2014 May;121(5):1092–101. Available from: <http://dx.doi.org/10.1016/j.ophtha.2013.11.031>
17. Kataja M, Hujanen P, Huhtala H, et al. Outcome of anti-vascular endothelial growth factor therapy for neovascular age-related macular degeneration in real-life setting. Available from: <http://dx.doi.org/10.1136/bjophthalmol-2017-311055>
18. Ozturk M, Harris ML, Nguyen V, et al. Real-world visual outcomes in patients with neovascular age-related macular degeneration receiving aflibercept at fixed intervals as per UK licence. *Clin Experiment Ophthalmol* [Internet]. 2017 Oct 17; Available from: <http://dx.doi.org/10.1111/ceo.13085>
19. Denaxas S, Direk K, Gonzalez-Izquierdo A, et al. Methods for enhancing the reproducibility of biomedical research findings using electronic health records. *BioData Min* [Internet]. 2017 Sep 11;10:31. Available from: <http://dx.doi.org/10.1186/s13040-017-0151-7>
20. von Elm E, Altman DG, Egger M, et al. The Strengthening the Reporting of Observational Studies in Epidemiology (STROBE) statement: guidelines for reporting observational studies. *Lancet* [Internet]. 2007 Oct 20;370(9596):1453–7. Available from: [http://dx.doi.org/10.1016/S0140-6736\(07\)61602-X](http://dx.doi.org/10.1016/S0140-6736(07)61602-X)
21. Benchimol EI, Smeeth L, Guttman A, et al. The REporting of studies Conducted using Observational Routinely-collected health Data (RECORD) statement. *PLoS Med* [Internet]. 2015 Oct;12(10):e1001885. Available from: <http://dx.doi.org/10.1371/journal.pmed.1001885>
22. Rodrigues IA, Sprinkhuizen SM, Barthelmes D, et al. Defining a Minimum Set of Standardized Patient-centered Outcome Measures for Macular Degeneration. *Am J Ophthalmol* [Internet]. 2016 Aug;168:1–12. Available from: <http://dx.doi.org/10.1016/j.ajo.2016.04.012>
23. Packer M. Data sharing in medical research. *BMJ* [Internet]. 2018 Feb 14;360:k510. Available from: <http://dx.doi.org/10.1136/bmj.k510>

- 1  
2  
3 24. Cohen D. Why have UK doctors been deterred from prescribing Avastin? *BMJ* [Internet].  
4 2015 Apr 1;350:h1654. Available from: <http://dx.doi.org/10.1136/bmj.h1654>  
5  
6 25. Hambleton D. Commentary: NHS patients should have a choice of drug for wet age-  
7 related macular degeneration, despite pressure from pharma. *BMJ* [Internet]. 2017 Oct  
8 31;359:j5013. Available from: <http://dx.doi.org/10.1136/bmj.j5013>  
9  
10 26. Lange C, Feltgen N, Junker B, et al. Resolving the clinical acuity categories “hand  
11 motion” and “counting fingers” using the Freiburg Visual Acuity Test (FrACT). *Graefes*  
12 *Arch Clin Exp Ophthalmol* [Internet]. 2009 Jan;247(1):137–42. Available from:  
13 <http://dx.doi.org/10.1007/s00417-008-0926-0>  
14  
15 27. RPB/Academy Award [Internet]. American Academy of Ophthalmology. 2017 [cited  
16 2018 Jun 24]. Available from: [https://www.aao.org/iris-registry/data-analysis/research-](https://www.aao.org/iris-registry/data-analysis/research-to-prevent-blindness-research-grants)  
17 [to-prevent-blindness-research-grants](https://www.aao.org/iris-registry/data-analysis/research-to-prevent-blindness-research-grants)  
18  
19 28. Arnold JJ, Campain A, Barthelmes D, et al. Two-Year Outcomes of “Treat and Extend”  
20 Intravitreal Therapy for Neovascular Age-Related Macular Degeneration.  
21 *Ophthalmology* [Internet]. 2015 Jun;122(6):1212–9. Available from:  
22 <http://linkinghub.elsevier.com/retrieve/pii/S0161642015001244>  
23  
24 29. Kim LN, Mehta H, Barthelmes D, et al. Metaanalysis of real-world outcomes of  
25 intravitreal ranibizumab for the treatment of neovascular age-related macular  
26 degeneration. *Retina* [Internet]. 2016 Aug;36(8):1418–31. Available from:  
27 <http://dx.doi.org/10.1097/IAE.0000000000001142>  
28  
29 30. Holz FG, Tadayoni R, Beatty S, et al. Key drivers of visual acuity gains in neovascular  
30 age-related macular degeneration in real life: findings from the AURA study. *Br J*  
31 *Ophthalmol* [Internet]. 2016 Dec;100(12):1623–8. Available from:  
32 <http://dx.doi.org/10.1136/bjophthalmol-2015-308166>  
33  
34 31. Sarwar S, Clearfield E, Soliman MK, et al. Aflibercept for neovascular age-related  
35 macular degeneration. *Cochrane Database Syst Rev* [Internet]. 2016 Feb  
36 8;2:CD011346. Available from: <http://dx.doi.org/10.1002/14651858.CD011346.pub2>  
37  
38 32. Lee AY, Lee CS, Egan CA, et al. UK AMD/DR EMR REPORT IX: comparative  
39 effectiveness of predominantly as needed (PRN) ranibizumab versus continuous  
40 aflibercept in UK clinical practice. *Br J Ophthalmol* [Internet]. 2017 Dec;101(12):1683–8.  
41 Available from: <http://dx.doi.org/10.1136/bjophthalmol-2016-309818>  
42  
43 33. Velilla S, García-Medina JJ, García-Layana A, et al. Smoking and age-related macular  
44 degeneration: review and update. *J Ophthalmol* [Internet]. 2013 Dec 4;2013:895147.  
45 Available from: <http://dx.doi.org/10.1155/2013/895147>  
46  
47 34. Kilkenney MF, Robinson KM. Data quality: “Garbage in - garbage out.” *Health Inf Manag*  
48 [Internet]. 2018 Sep;47(3):103–5. Available from:  
49 <http://dx.doi.org/10.1177/1833358318774357>  
50  
51  
52  
53  
54  
55  
56  
57  
58  
59  
60

## Figure legends

Figure 1: Visual acuity (A&C) and change in visual acuity (B&D) over time for all eyes and stratified by follow-up period (black: one year completers only; grey: two year completers). Bars represent 95% confidence intervals.

Figure 2: Percentage of eyes with good VA ( $\geq 70$  letters), intermediate VA (36-69 letters), and poor VA ( $\leq 35$  letters) at different follow-up times (A) and comparison of cohorts of different follow-up times at one year (B). VA - visual acuity

Figure 3: Change in visual acuity stratified by baseline VA (A), baseline age (B), and injection number at two years (C). Bars represent 95% confidence intervals.

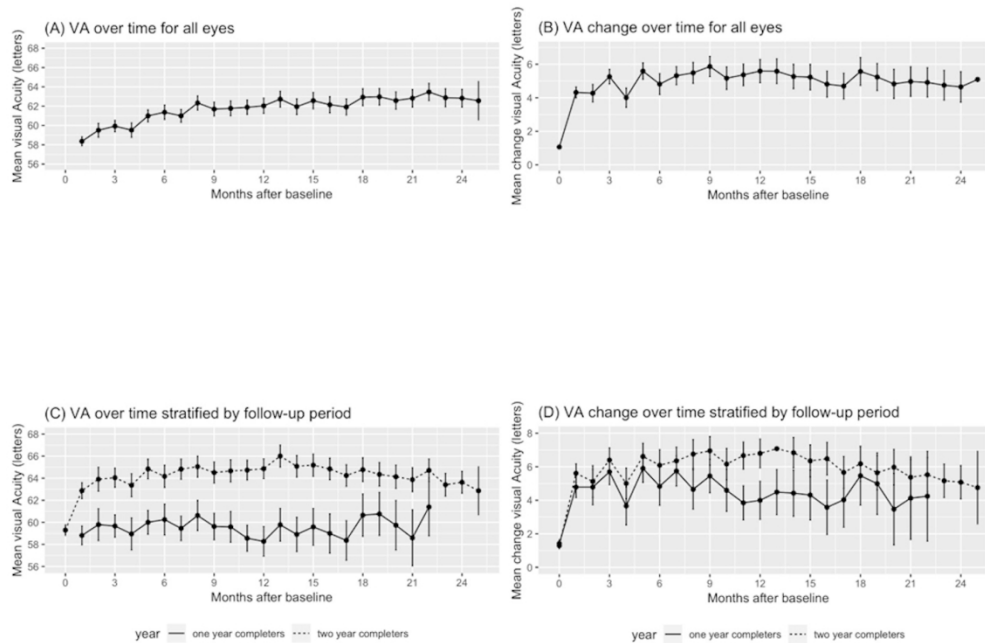

Figure 1: Visual acuity (A&C) and change in visual acuity (B&D) over time for all eyes and stratified by follow-up period (black: one year completers only; grey: two year completers). Bars represent 95% confidence intervals.

1  
2  
3  
4  
5  
6  
7  
8  
9  
10  
11  
12  
13  
14  
15  
16  
17  
18  
19  
20  
21  
22  
23  
24  
25  
26  
27  
28  
29  
30  
31  
32  
33  
34  
35  
36  
37  
38  
39  
40  
41  
42  
43  
44  
45  
46  
47  
48  
49  
50  
51  
52  
53  
54  
55  
56  
57  
58  
59  
60

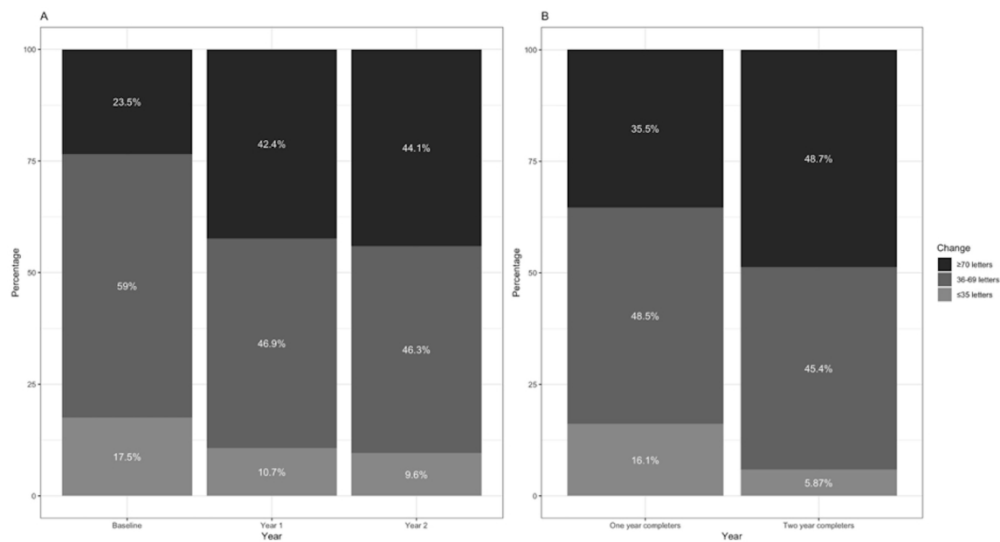

Figure 2: Percentage of eyes with good VA ( $\geq 70$  letters), intermediate VA (36-69 letters), and poor VA ( $\leq 35$  letters) at different follow-up times (A) and comparison of cohorts of different follow-up times at one year (B). VA - visual acuity

1  
2  
3  
4  
5  
6  
7  
8  
9  
10  
11  
12  
13  
14  
15  
16  
17  
18  
19  
20  
21  
22  
23  
24  
25  
26  
27  
28  
29  
30  
31  
32  
33  
34  
35  
36  
37  
38  
39  
40  
41  
42  
43  
44  
45  
46  
47  
48  
49  
50  
51  
52  
53  
54  
55  
56  
57  
58  
59  
60



Figure 3: Change in visual acuity stratified by baseline VA (A), baseline age (B), and injection number at two years (C). Bars represent 95% confidence intervals.

# Supplementary material

## Supplementary 1: Data cleaning

**Manual data cleaning** was carried out according to the following rules:

VA: Missing or zero VA entries were manually checked in paper notes. If available from within 7 days before injection date, the respective VA was manually entered. Eyes with VA < 25 letters (below National Institute for Health and Care Excellence criteria for treatment of neovascular AMD) at first presentation were checked manually. VA measured in Snellen were converted to ETDRS letters. Visual acuities below measurable ETDRS letters were converted to logMAR 2.0/-15 letters, logMAR 2.3/-30 letters and logMAR 2.7/-50 letters for count fingers, hand movements, and light perception respectively. Patient age: All patients <55 or >100 years of age at first presentation were checked manually to address misdiagnosis. Injection number: All eyes having received  $\geq 50$  injections were manually checked to avoid errors of manual input of legacy injection numbers.

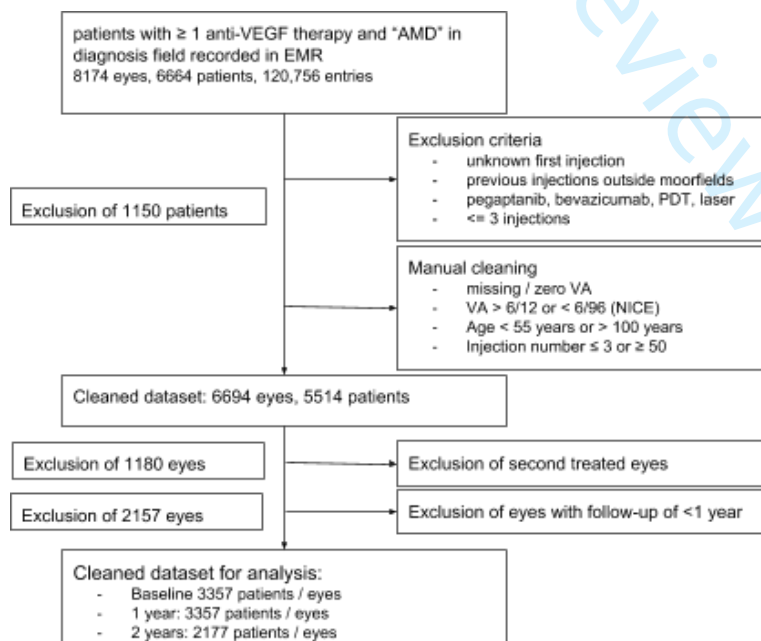

sFigure 1: Consort flow diagram data of data collection and cleaning. VEGF – vascular endothelial growth factor, EMR – electronic health record, PDT – photodynamic therapy, VA – visual acuity, NICE – National Institute of Health and Care Excellence



**Supplementary 2: Regression model**

| <u>Year 1</u>                                                    | <b>Estimated coefficients</b> | <b>Standard error</b> | <b>95% CI</b>    | <b>p-value</b> |
|------------------------------------------------------------------|-------------------------------|-----------------------|------------------|----------------|
| Gender - Male                                                    | - 0.19                        | 0.49                  | -1.14 to 0.77    | 0.70           |
| Age at baseline                                                  | - 0.23                        | 0.23                  | - 0.29 to - 0.17 | < 0.001        |
| VA at baseline (ETDRS letters)                                   | - 0.35                        | 0.2                   | - 0.38 to - 0.32 | < 0.001        |
| Number of injections at 1 year                                   | 0.39                          | 0.13                  | 0.14 to 0.64     | < 0.01         |
| R2 0.13<br>F-statistic 131.6 on 4 and 3352 DF<br>p-value < 0.001 |                               |                       |                  |                |

sTable 1: Specifications for regression model for year 1.

CI – confidence interval, VA – visual acuity, ETDRS – Early Treatment Diabetic Retinopathy Study

| <u>Year 2</u>                                                    | <b>Estimated coefficients</b> | <b>Standard error</b> | <b>95% CI</b>    | <b>p-value</b> |
|------------------------------------------------------------------|-------------------------------|-----------------------|------------------|----------------|
| Gender - Male                                                    | - 0.73                        | 0.64                  | -1.98 to 0.53    | 0.26           |
| Age at baseline                                                  | - 0.23                        | 0.04                  | - 0.30 to - 0.15 | < 0.001        |
| VA at baseline (ETDRS letters)                                   | - 0.47                        | 0.02                  | - 0.51 to - 0.43 | < 0.001        |
| Number of injections at 1 year                                   | 0.20                          | 0.08                  | 0.04 to 0.36     | < 0.05         |
| R2 0.18<br>F-statistic 123.1 on 4 and 2172 DF<br>p-value < 0.001 |                               |                       |                  |                |

sTable 2: Specifications for regression model for year 2.

CI – confidence interval, VA – visual acuity, ETDRS – Early Treatment Diabetic Retinopathy Study

1  
2  
3 **Supplementary 3: Comparison of Outcomes of Age-related Macular Degeneration**  
4 **Trials**  
5  
6  
7  
8

9  
10  
11  
12  
13  
14  
15  
16  
17  
18  
19  
20  
21  
22  
23  
24  
25  
26  
27  
28  
29  
30  
31  
32  
33  
34  
35  
36

| Two year results                         | Retrospective, real-life studies |                             |                               |                      | Prospective randomised trials |                        |
|------------------------------------------|----------------------------------|-----------------------------|-------------------------------|----------------------|-------------------------------|------------------------|
|                                          | Moorfields<br>R / A<br>1737 eyes | EMR Users<br>R<br>4990 eyes | FRB<br>B / R / A<br>1189 eyes | FRB<br>A<br>136 eyes | CATT<br>R / B<br>1107 eyes    | VIEW<br>A<br>2063 eyes |
| Baseline age (years)                     | 77                               | 80                          | 79                            | 77                   | 79                            | 75.6-76.5              |
| Baseline VA (letters)                    | 57.8                             | 55                          | 56.5                          | 61.4                 | 59.9-61.6                     | 53.6-54.0              |
| Change in VA (letters)                   | 4.9                              | +1                          | +5.3                          | +6                   | 8.0-8.5                       | 7.6-7.9                |
| % of eyes with good VA ( $\geq 20/40$ )  | 44%                              | 30%                         | 45%                           | 58%                  | 67-68%                        | 30.7-34.9              |
| % of eyes with poor VA ( $\leq 20/200$ ) | 10%                              | -                           | 11%                           | 10%                  | 4.7-8.4%                      | -                      |
| Mean injection number                    | 13.0                             | 9.4                         | 13                            | 13.6                 | 11.8                          | 16.5                   |

37  
38  
39 sTable 3: Comparison of two year outcomes with other real-life studies and randomised  
40 controlled trials. VA - visual acuity, A - aflibercept, R - ranibizumab, B - bevacizumab, EMR -  
41 electronic medical record, FRB - fight retinal blindness, CATT - comparison of Age-related  
42 Macular Degeneration Treatments Trials, VIEW - VEGF Trap-Eye: Investigation of Efficacy  
43 and Safety in Wet AMD  
44  
45  
46  
47  
48  
49  
50  
51  
52  
53  
54  
55  
56  
57  
58  
59  
60

## Supplementary 4: Treatment guidelines for aflibercept

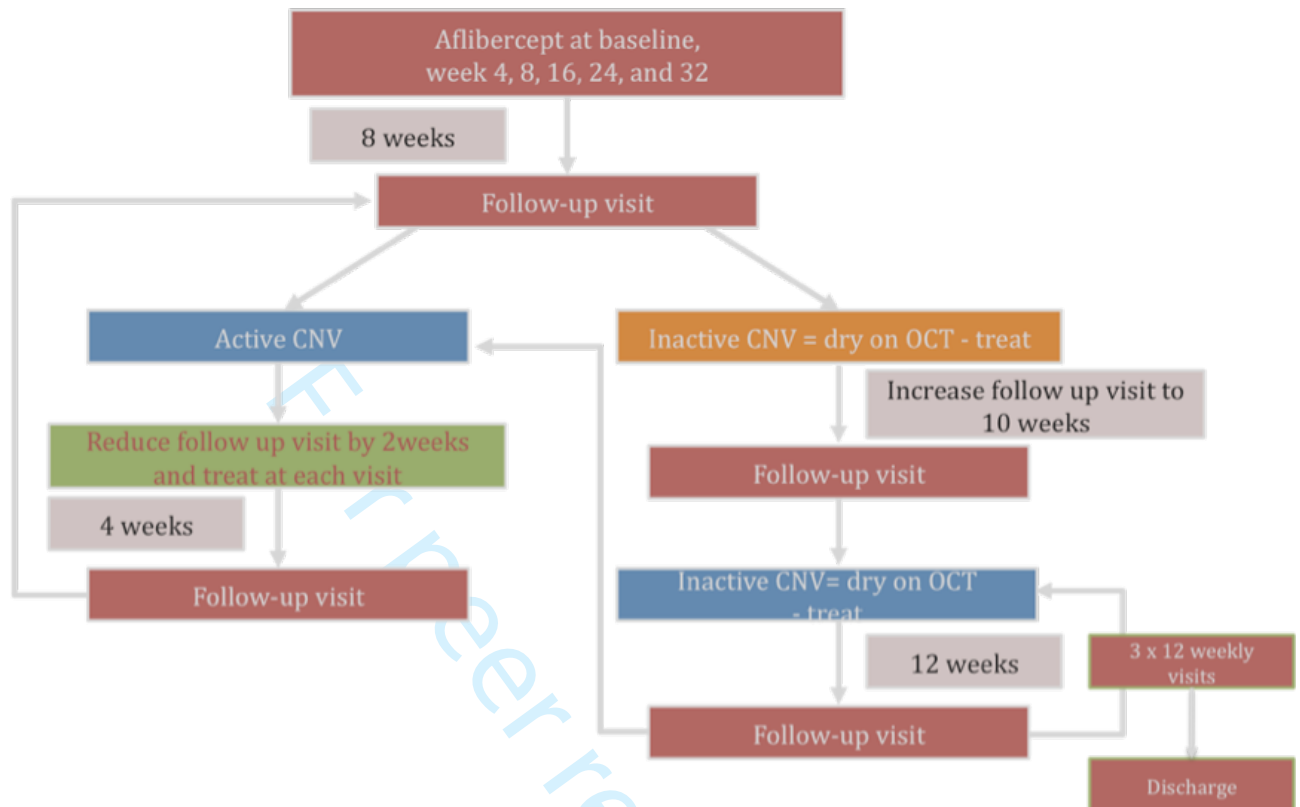

Figure 2: Treatment flow chart for aflibercept treatment in new cases of neovascular AMD at Moorfields Eye Hospital. Derived from *Guidelines for the intravitreal service for the treatment of age-related macular degeneration (version 2.0)*. AMD - Age related macular degeneration

# Reporting checklist for cohort study.

Based on the STROBE cohort guidelines.

## Instructions to authors

Complete this checklist by entering the page numbers from your manuscript where readers will find each of the items listed below.

Your article may not currently address all the items on the checklist. Please modify your text to include the missing information. If you are certain that an item does not apply, please write "n/a" and provide a short explanation.

Upload your completed checklist as an extra file when you submit to a journal.

In your methods section, say that you used the STROBE cohort reporting guidelines, and cite them as:

von Elm E, Altman DG, Egger M, Pocock SJ, Gøtzsche PC, Vandenbroucke JP. The Strengthening the Reporting of Observational Studies in Epidemiology (STROBE) Statement: guidelines for reporting observational studies.

|                        |     | Reporting Item                                                                                                                  | Page Number |
|------------------------|-----|---------------------------------------------------------------------------------------------------------------------------------|-------------|
| Title                  | #1a | Indicate the study's design with a commonly used term in the title or the abstract                                              | 5           |
| Abstract               | #1b | Provide in the abstract an informative and balanced summary of what was done and what was found                                 | 5           |
| Background / rationale | #2  | Explain the scientific background and rationale for the investigation being reported                                            | 8, 9        |
| Objectives             | #3  | State specific objectives, including any prespecified hypotheses                                                                | 9           |
| Study design           | #4  | Present key elements of study design early in the paper                                                                         | 10          |
| Setting                | #5  | Describe the setting, locations, and relevant dates, including periods of recruitment, exposure, follow-up, and data collection | 10, 11      |
| Eligibility criteria   | #6a | Give the eligibility criteria, and the sources and methods of selection of participants. Describe methods of follow-up.         | 10, 11      |
|                        | #6b | For matched studies, give matching criteria and number of exposed                                                               |             |

|    |                     |               |                                                                       |
|----|---------------------|---------------|-----------------------------------------------------------------------|
|    |                     | and unexposed |                                                                       |
| 1  |                     |               |                                                                       |
| 2  | Variables           | #7            | Clearly define all outcomes, exposures, predictors, potential         |
| 3  |                     |               | 10, 11                                                                |
| 4  |                     |               | confounders, and effect modifiers. Give diagnostic criteria, if       |
| 5  |                     |               | applicable                                                            |
| 6  |                     |               |                                                                       |
| 7  | Data sources /      | #8            | For each variable of interest give sources of data and details of     |
| 8  | measurement         |               | 10, 11,                                                               |
| 9  |                     |               | suppl. 1                                                              |
| 10 |                     |               | methods of assessment (measurement). Describe comparability of        |
| 11 |                     |               | assessment methods if there is more than one group. Give              |
| 12 |                     |               | information separately for for exposed and unexposed groups if        |
| 13 |                     |               | applicable.                                                           |
| 14 |                     |               |                                                                       |
| 15 | Bias                | #9            | Describe any efforts to address potential sources of bias             |
| 16 |                     |               | 11                                                                    |
| 17 | Study size          | #10           | Explain how the study size was arrived at                             |
| 18 |                     |               | 10,                                                                   |
| 19 |                     |               | suppl. 1                                                              |
| 20 |                     |               |                                                                       |
| 21 | Quantitative        | #11           | Explain how quantitative variables were handled in the analyses. If   |
| 22 | variables           |               | 10, 11                                                                |
| 23 |                     |               | applicable, describe which groupings were chosen, and why             |
| 24 |                     |               |                                                                       |
| 25 | Statistical methods | #12a          | Describe all statistical methods, including those used to control for |
| 26 |                     |               | 11, 12                                                                |
| 27 |                     |               | confounding                                                           |
| 28 |                     |               |                                                                       |
| 29 |                     | #12b          | Describe any methods used to examine subgroups and interactions       |
| 30 |                     |               | 12                                                                    |
| 31 |                     | #12c          | Explain how missing data were addressed                               |
| 32 |                     |               | 11, 12                                                                |
| 33 |                     | #12d          | If applicable, explain how loss to follow-up was addressed            |
| 34 |                     |               | 14                                                                    |
| 35 |                     | #12e          | Describe any sensitivity analyses                                     |
| 36 |                     |               | 14                                                                    |
| 37 | Participants        | #13a          | Report numbers of individuals at each stage of study—eg numbers       |
| 38 |                     |               | 14                                                                    |
| 39 |                     |               | potentially eligible, examined for eligibility, confirmed eligible,   |
| 40 |                     |               | included in the study, completing follow-up, and analysed. Give       |
| 41 |                     |               | information separately for for exposed and unexposed groups if        |
| 42 |                     |               | applicable.                                                           |
| 43 |                     |               |                                                                       |
| 44 |                     | #13b          | Give reasons for non-participation at each stage                      |
| 45 |                     |               | 14                                                                    |
| 46 |                     | #13c          | Consider use of a flow diagram                                        |
| 47 |                     |               | Suppl.1                                                               |
| 48 | Descriptive data    | #14a          | Give characteristics of study participants (eg demographic, clinical, |
| 49 |                     |               | 13, 14                                                                |
| 50 |                     |               | social) and information on exposures and potential confounders.       |
| 51 |                     |               | Give information separately for exposed and unexposed groups if       |
| 52 |                     |               | applicable.                                                           |
| 53 |                     |               |                                                                       |
| 54 |                     |               |                                                                       |
| 55 |                     |               |                                                                       |
| 56 |                     |               |                                                                       |
| 57 |                     |               |                                                                       |
| 58 |                     |               |                                                                       |
| 59 |                     |               |                                                                       |
| 60 |                     |               |                                                                       |

|    |                  |      |                                                                          |       |
|----|------------------|------|--------------------------------------------------------------------------|-------|
| 1  |                  | #14b | Indicate number of participants with missing data for each variable      | 14    |
| 2  |                  |      | of interest                                                              |       |
| 3  |                  |      |                                                                          |       |
| 4  |                  |      |                                                                          |       |
| 5  |                  | #14c | Summarise follow-up time (eg, average and total amount)                  | 14    |
| 6  |                  |      |                                                                          |       |
| 7  | Outcome data     | #15  | Report numbers of outcome events or summary measures over time.          | 15    |
| 8  |                  |      | Give information separately for exposed and unexposed groups if          |       |
| 9  |                  |      | applicable.                                                              |       |
| 10 |                  |      |                                                                          |       |
| 11 |                  |      |                                                                          |       |
| 12 | Main results     | #16a | Give unadjusted estimates and, if applicable, confounder-adjusted        | 14-15 |
| 13 |                  |      | estimates and their precision (eg, 95% confidence interval). Make        |       |
| 14 |                  |      | clear which confounders were adjusted for and why they were              |       |
| 15 |                  |      | included                                                                 |       |
| 16 |                  |      |                                                                          |       |
| 17 |                  |      |                                                                          |       |
| 18 |                  |      |                                                                          |       |
| 19 |                  | #16b | Report category boundaries when continuous variables were                |       |
| 20 |                  |      | categorized                                                              |       |
| 21 |                  |      |                                                                          |       |
| 22 |                  |      |                                                                          |       |
| 23 |                  | #16c | If relevant, consider translating estimates of relative risk into        |       |
| 24 |                  |      | absolute risk for a meaningful time period                               |       |
| 25 |                  |      |                                                                          |       |
| 26 |                  |      |                                                                          |       |
| 27 | Other analyses   | #17  | Report other analyses done—e.g., analyses of subgroups and               | 15    |
| 28 |                  |      | interactions, and sensitivity analyses                                   |       |
| 29 |                  |      |                                                                          |       |
| 30 |                  |      |                                                                          |       |
| 31 | Key results      | #18  | Summarise key results with reference to study objectives                 | 16    |
| 32 |                  |      |                                                                          |       |
| 33 | Limitations      | #19  | Discuss limitations of the study, taking into account sources of         | 16-19 |
| 34 |                  |      | potential bias or imprecision. Discuss both direction and magnitude      |       |
| 35 |                  |      | of any potential bias.                                                   |       |
| 36 |                  |      |                                                                          |       |
| 37 |                  |      |                                                                          |       |
| 38 | Interpretation   | #20  | Give a cautious overall interpretation considering objectives,           | 16-19 |
| 39 |                  |      | limitations, multiplicity of analyses, results from similar studies, and |       |
| 40 |                  |      | other relevant evidence.                                                 |       |
| 41 |                  |      |                                                                          |       |
| 42 |                  |      |                                                                          |       |
| 43 | Generalisability | #21  | Discuss the generalisability (external validity) of the study results    | 19    |
| 44 |                  |      |                                                                          |       |
| 45 |                  |      |                                                                          |       |
| 46 | Funding          | #22  | Give the source of funding and the role of the funders for the present   | 2     |
| 47 |                  |      | study and, if applicable, for the original study on which the present    |       |
| 48 |                  |      | article is based                                                         |       |
| 49 |                  |      |                                                                          |       |
| 50 |                  |      |                                                                          |       |

51 The STROBE checklist is distributed under the terms of the Creative Commons Attribution License CC-BY.  
 52 This checklist was completed on 22. October 2018 using <http://www.goodreports.org/>, a tool made by the  
 53 [EQUATOR Network](#) in collaboration with [Penelope.ai](#)  
 54  
 55  
 56  
 57  
 58  
 59  
 60
